# Supplementary material for: Metal‐only Lewis Pairs of Rhodium with s, p and d‐Block Metals
Source: PubMed Central journal article supplement (PMC7756578; doi:10.1002/chem.202003167), 2020-11-09
Supplement: CHEM-26-16833-s001.pdf [file CHEM-26-16833-s001.pdf]

# Chemistry–A European Journal

Supporting Information

## **Metal-only Lewis Pairs of Rhodium with *s*, *p* and *d*-Block Metals**

Sonia Bajo<sup>+</sup>, Macarena G. Alférez<sup>+</sup>, María M. Alcaide, Joaquín López-Serrano,<sup>\*</sup> and Jesús Campos<sup>\*,[a]</sup>

## SUPPORTING INFORMATION

|                                                             |     |
|-------------------------------------------------------------|-----|
| 1. Synthesis and characterization of rhodium compounds..... | S2  |
| 2. X-Ray structural characterization of new compounds ..... | S3  |
| 3. NMR spectra of new compounds .....                       | S6  |
| 4. Additional computational details.....                    | S23 |
| 5. References .....                                         | S30 |

## 1. Synthesis and characterization of rhodium compounds.

**Compound 1**  $[(\eta^5\text{-C}_5\text{Me}_5)\text{Rh}(\text{PMe}_3)_2]$ . We used a slight modification of the procedure previously reported by Werner.<sup>1</sup> A sodium amalgam was prepared by dissolving Na metal (172 mg, 7.5 mmol) onto mercury (4.5 mL) under argon atmosphere. Diethyl ether (20 mL),  $\text{PMe}_3$  (6.8 mL, 6.66 mmol) and a toluene (5 mL) solution of  $[(\eta^5\text{-C}_5\text{Me}_5)\text{RhCl}_2]_2$ <sup>2</sup> (927 mg, 1.5 mmol) were subsequently added stepwise. The mixture was stirred for 8 hours after which it was filtrated and extracted with pentane (20 mL). The red solution was concentrated to *ca.* 5 mL and stored at -78 °C. Rhombic brown crystals of **1** were obtained after 5 days (750 mg, 60%). <sup>1</sup>H NMR (300 MHz,  $\text{C}_6\text{D}_6$ , 25 °C)  $\delta$ : 2.17 (s, 15 H,  $\text{C}_5\text{Me}_5$ ), 1.3 (vt, 18 H,  $\text{PMe}_3$ ). <sup>31</sup>P {<sup>1</sup>H} NMR (121 MHz,  $\text{C}_6\text{D}_6$ , 25 °C)  $\delta$ : -6.6 (d, <sup>1</sup> $J_{\text{PRh}} = 216$  Hz). <sup>103</sup>Rh {<sup>1</sup>H} NMR (15.94 MHz,  $\text{C}_6\text{D}_6$ , 25 °C)  $\delta$ : -9165.

**Compound**  $[(\eta^5\text{-C}_5\text{Me}_5)\text{RhH}(\text{PMe}_3)_2]\text{PF}_6$ . The rhodium hydride was best prepared by adding  $\text{NH}_4\text{PF}_6$  (50 mg, 0.12 mmol) over a THF (5 mL) solution of **1** (21 mg, 0.12 mmol). The solution was stirred during 30 minutes, time after which addition of pentane (20 mL) caused precipitation of **2**. The recorded spectroscopic data matched those previously reported by Werner.<sup>1</sup> <sup>1</sup>H NMR (400 MHz, THF, 25 °C)  $\delta$ : 1.99 (s, 15 H,  $\text{C}_5\text{Me}_5$ ), 1.62 (br vt, 18 H,  $\text{PMe}_3$ , <sup>2</sup> $J_{\text{HP}} = 5.1$  Hz), -13.35 (td, RhH, <sup>2</sup> $J_{\text{HP}} = 23.4$  Hz, <sup>1</sup> $J_{\text{HRh}} = 34.9$  Hz). <sup>13</sup>C {<sup>1</sup>H} NMR (100 MHz, THF, 25 °C)  $\delta$ : 11.0 ( $\text{C}_5\text{Me}_5$ ), 20.7 (vt, <sup>1</sup> $J_{\text{CP}} = 16$  Hz,  $\text{PMe}_3$ ), 103.0 ( $\text{C}_5\text{Me}_5$ ). <sup>31</sup>P {<sup>1</sup>H} NMR (162 MHz, THF, 25 °C)  $\delta$ : -1.4 (dd, <sup>1</sup> $J_{\text{PRh}} = 137$  Hz, <sup>2</sup> $J_{\text{PP}} = 14$  Hz).

**Addition of  $\text{MBAr}_F$  (M = Li, Na) to 1.** A J. Young NMR tube was charged with **1** (7 mg, 0.018 mmol),  $\text{MBAr}^F$  (M = Li, Na; 16 mg, 0.018 mmol) and deuterated bromobenzene (0.5 mL). Complete consumption of **1** towards the postulated  $[\text{A}\cdot\text{M}]$  compounds was instantaneous (100% NMR yield). Reactions at higher concentrations proved inconvenient due to reduced solubility. Selected spectroscopic data:  $[\text{A}\cdot\text{Na}]$ . <sup>1</sup>H NMR (400 MHz,  $\text{C}_6\text{D}_5\text{Br}$ , 25 °C):  $\delta$  8.40 (s, 8 H, *o*-Ar), 7.81 (s, 4 H, *p*-Ar), 1.66 (s, 15 H,  $\text{C}_5\text{Me}_5$ ), 1.17 (br, 18 H,  $\text{PMe}_3$ ). <sup>13</sup>C {<sup>1</sup>H} NMR (101 MHz,  $\text{C}_6\text{D}_5\text{Br}$ , 25 °C):  $\delta$  162.2 (br, *ipso*-Ar), 135.2 (*o*-Ar), 117.9 (*p*-Ar), 101.8 (s,  $\text{C}_5\text{Me}_5$ ), 20.3 (t, <sup>1</sup> $J_{\text{CP}} = 17$  Hz,  $\text{PMe}_3$ ), 10.6 (s,  $\text{C}_5\text{Me}_5$ ). <sup>31</sup>P {<sup>1</sup>H} NMR (202 MHz,  $\text{C}_6\text{D}_5\text{Br}$ , 25 °C):  $\delta$  -3.1 (d, <sup>1</sup> $J_{\text{PRh}} = 138$ ). <sup>103</sup>Rh {<sup>1</sup>H} NMR (15.94 MHz,  $\text{C}_6\text{D}_5\text{Br}$ , 25 °C):  $\delta$  -9262.  $[\text{A}\cdot\text{Li}]$ . <sup>1</sup>H NMR (400 MHz,  $\text{C}_6\text{D}_5\text{Br}$ , 25 °C):  $\delta$  8.96 (s, 8 H, *o*-Ar), 8.86 (s, 4 H, *p*-Ar), 1.61 (s, 15 H,  $\text{C}_5\text{Me}_5$ ), 1.11 (br, 18 H,  $\text{PMe}_3$ ). <sup>31</sup>P {<sup>1</sup>H} NMR (202 MHz,  $\text{C}_6\text{D}_5\text{Br}$ , 25 °C):  $\delta$  -3.0 (d, <sup>1</sup> $J_{\text{PRh}} = 130$ ). <sup>103</sup>Rh {<sup>1</sup>H} NMR (15.94 MHz,  $\text{C}_6\text{D}_5\text{Br}$ , 298 K):  $\delta$  -9261.

## 2. X-Ray structural characterization of new compounds

**Crystallographic details.** Low-temperature diffraction data were collected on a Bruker D8 Quest APEX-III single crystal diffractometer with a Photon III detector and a I $\mu$ S 3.0 microfocus X-ray source (**1**·GeCl<sub>2</sub>, **1**·SnCl<sub>2</sub>, **1**·AlMe<sub>3</sub>, **1**·ZnMe<sub>2</sub>, **1**·Zn(C<sub>6</sub>F<sub>5</sub>)<sub>2</sub>, **3**) at the Instituto de Investigaciones Químicas, Sevilla. Data were collected by means of  $\omega$  and  $\varphi$  scans using monochromatic radiation  $\lambda(\text{Mo K}\alpha 1) = 0.71073 \text{ \AA}$ . The diffraction images collected were processed and scaled using APEX-III or APEX-II software. The structures were solved with SHELXT and was refined against  $F^2$  on all data by full-matrix least squares with SHELXL.<sup>3</sup> All non-hydrogen atoms were refined anisotropically. Hydrogen atoms were included in the model at geometrically calculated positions and refined using a riding model, unless otherwise noted. The isotropic displacement parameters of all hydrogen atoms were fixed to 1.2 times the U value of the atoms to which they are linked (1.5 times for methyl groups). **1**·GeCl<sub>2</sub>, **1**·ZnMe<sub>2</sub> and **1**·AlMe<sub>3</sub> were refined as inversion twins. For the latter anisotropic displacement parameters of the terminal methyl group of PMe<sub>3</sub> ligands were restrained to be similar to their phosphorus nuclei by using SIMU and DELU commands. Structure **3** was refined as a twinned structure with 68:32 components and present substitutional disorder between a bromide and a methyl group at the terminal Mg-X fragment (Br:Me, 74:26).

The full numbering scheme of all the reported structures can be found in the full details of the X-ray structure determination (CIF), which is included as Supporting Information.

**Table S1.** Crystal data and structure refinement for compounds **1·GeCl<sub>2</sub>**, **1·SnCl<sub>2</sub>** and **1·AlMe<sub>3</sub>**.

|                                                                          | <b>1·GeCl<sub>2</sub></b>                                           | <b>1·SnCl<sub>2</sub></b>                                           | <b>1·AlMe<sub>3</sub></b>                           |
|--------------------------------------------------------------------------|---------------------------------------------------------------------|---------------------------------------------------------------------|-----------------------------------------------------|
| formula                                                                  | C <sub>16</sub> H <sub>33</sub> Cl <sub>2</sub> GeP <sub>2</sub> Rh | C <sub>16</sub> H <sub>33</sub> Cl <sub>2</sub> P <sub>2</sub> RhSn | C <sub>19</sub> H <sub>42</sub> AlP <sub>2</sub> Rh |
| fw                                                                       | 533.76                                                              | 579.86                                                              | 462.35                                              |
| cryst.size, mm                                                           | 0.18 × 0.14 × 0.10                                                  | 0.12 × 0.09 × 0.07                                                  | 0.20 × 0.10 × 0.09                                  |
| crystal system                                                           | Monoclinic                                                          | Monoclinic                                                          | Orthorhombic                                        |
| space group                                                              | <i>P2<sub>1</sub></i>                                               | <i>P2<sub>1</sub>/n</i>                                             | <i>Pna2<sub>1</sub></i>                             |
| <i>a</i> , Å                                                             | 8.7747 (5)                                                          | 8.8303 (3)                                                          | 17.2718 (16)                                        |
| <i>b</i> , Å                                                             | 29.4171 (19)                                                        | 44.1554 (12)                                                        | 9.1353 (8)                                          |
| <i>c</i> , Å                                                             | 16.9592 (8)                                                         | 17.1551 (5)                                                         | 14.9420 (11)                                        |
| <i>α</i> , deg                                                           | 90                                                                  | 90                                                                  | 90                                                  |
| <i>β</i> , deg                                                           | 94.002 (2)                                                          | 92.967 (1)                                                          | 90                                                  |
| <i>γ</i> , deg                                                           | 90                                                                  | 90                                                                  | 90                                                  |
| <i>V</i> , Å <sup>3</sup>                                                | 4366.9 (4)                                                          | 6679.9 (3)                                                          | 2357.6 (3)                                          |
| <i>T</i> , K                                                             | 193                                                                 | 193                                                                 | 193                                                 |
| <i>Z</i>                                                                 | 8                                                                   | 12                                                                  | 4                                                   |
| <i>ρ</i> <sub>calc</sub> , g cm <sup>-3</sup>                            | 1.624                                                               | 1.730                                                               | 1.303                                               |
| <i>μ</i> , mm <sup>-1</sup> (MoK $\alpha$ )                              | 2.52                                                                | 2.24                                                                | 0.90                                                |
| <i>F</i> (000)                                                           | 2160                                                                | 3456                                                                | 976                                                 |
| absorption corrections                                                   | multi-scan, 0.63-0.75                                               | multi-scan, 0.59-0.75                                               | multi-scan, 0.61-0.75                               |
| <i>θ</i> range, deg                                                      | 2.3 – 29.1                                                          | 2.2 – 29.6                                                          | 2.4 – 25.7                                          |
| no. of rflns measd                                                       | 44756                                                               | 116036                                                              | 14836                                               |
| <i>R</i> <sub>int</sub>                                                  | 0.047                                                               | 0.034                                                               | 0.056                                               |
| no. of rflns unique                                                      | 18847                                                               | 18751                                                               | 4420                                                |
| no. of params / restraints                                               | 837 / 1                                                             | 628 / 0                                                             | 219 / 49                                            |
| <i>R</i> <sub>1</sub> ( <i>I</i> > 2 $\sigma$ ( <i>I</i> )) <sup>a</sup> | 0.037                                                               | 0.035                                                               | 0.057                                               |
| <i>R</i> <sub>1</sub> (all data)                                         | 0.047                                                               | 0.042                                                               | 0.073                                               |
| <i>wR</i> <sub>2</sub> ( <i>I</i> > 2 $\sigma$ ( <i>I</i> ))             | 0.070                                                               | 0.077                                                               | 0.140                                               |
| <i>wR</i> <sub>2</sub> (all data)                                        | 0.073                                                               | 0.079                                                               | 0.152                                               |
| Diff.Fourier.peaks min/max, eÅ <sup>-3</sup>                             | -0.59 / 0.89                                                        | -1.50 / -1.07                                                       | -1.31 / 1.00                                        |
| CCDC number                                                              | 1996856                                                             | 1996860                                                             | 1996858                                             |

**Table S2.** Crystal data and structure refinement for compounds **1·ZnMe<sub>2</sub>**, **1·Zn(C<sub>6</sub>F<sub>5</sub>)<sub>2</sub>** and **3**.

|                                                                          | <b>1·ZnMe<sub>2</sub></b>                           | <b>1·Zn(C<sub>6</sub>F<sub>5</sub>)<sub>2</sub></b>                 | <b>3</b>                                                                                                |
|--------------------------------------------------------------------------|-----------------------------------------------------|---------------------------------------------------------------------|---------------------------------------------------------------------------------------------------------|
| formula                                                                  | C <sub>18</sub> H <sub>39</sub> P <sub>2</sub> RhZn | C <sub>31</sub> H <sub>36</sub> F <sub>10</sub> P <sub>2</sub> RhZn | C <sub>32.52</sub> H <sub>67.55</sub> Br <sub>3.48</sub> Mg <sub>2</sub> P <sub>4</sub> Rh <sub>2</sub> |
| fw                                                                       | 485.71                                              | 828.82                                                              | 1115.06                                                                                                 |
| cryst.size, mm                                                           | 0.22 × 0.20 × 0.12                                  | 0.22 × 0.20 × 0.16                                                  | 0.12 × 0.08 × 0.04                                                                                      |
| crystal system                                                           | Monoclinic                                          | Monoclinic                                                          | Monoclinic                                                                                              |
| space group                                                              | <i>P2<sub>1</sub></i>                               | <i>P2<sub>1</sub>/n</i>                                             | <i>P2<sub>1</sub>/c</i>                                                                                 |
| <i>a</i> , Å                                                             | 8.6079 (5)                                          | 10.6975 (5)                                                         | 9.9631 (5)                                                                                              |
| <i>b</i> , Å                                                             | 15.1035 (9)                                         | 19.1905 (9)                                                         | 15.0180 (9)                                                                                             |
| <i>c</i> , Å                                                             | 9.4286 (7)                                          | 16.6640 (9)                                                         | 14.9008 (9)                                                                                             |
| <i>α</i> , deg                                                           | 90                                                  | 90                                                                  | 90                                                                                                      |
| <i>β</i> , deg                                                           | 112.528 (2)                                         | 101.283 (2)                                                         | 101.406 (2)                                                                                             |
| <i>γ</i> , deg                                                           | 90                                                  | 90                                                                  | 90                                                                                                      |
| <i>V</i> , Å <sup>3</sup>                                                | 1132.27 (13)                                        | 3354.8 (3)                                                          | 2185.5 (2)                                                                                              |
| <i>T</i> , K                                                             | 193                                                 | 193                                                                 | 193                                                                                                     |
| <i>Z</i>                                                                 | 2                                                   | 4                                                                   | 2                                                                                                       |
| $\rho_{\text{calc}}$ , g cm <sup>-3</sup>                                | 1.425                                               | 1.641                                                               | 1.694                                                                                                   |
| $\mu$ , mm <sup>-1</sup> (MoK $\alpha$ )                                 | 1.93                                                | 1.38                                                                | 4.13                                                                                                    |
| <i>F</i> (000)                                                           | 504                                                 | 1668                                                                | 1117                                                                                                    |
| absorption corrections                                                   | multi-scan, 0.64-0.75                               | multi-scan, 0.61-0.75                                               | multi-scan, 0.02-0.04                                                                                   |
| $\theta$ range, deg                                                      | 2.3 – 25.7                                          | 2.2 – 30.6                                                          | 2.0 – 25.1                                                                                              |
| no. of rflns measd                                                       | 13448                                               | 162363                                                              | 3862                                                                                                    |
| <i>R</i> <sub>int</sub>                                                  | 0.052                                               | 0.045                                                               | -                                                                                                       |
| no. of rflns unique                                                      | 4302                                                | 10275                                                               | 3862                                                                                                    |
| no. of params / restraints                                               | 213 / 1                                             | 417 / 17                                                            | 222 / 0                                                                                                 |
| <i>R</i> <sub>1</sub> ( <i>I</i> > 2 $\sigma$ ( <i>I</i> )) <sup>a</sup> | 0.031                                               | 0.032                                                               | 0.056                                                                                                   |
| <i>R</i> <sub>1</sub> (all data)                                         | 0.036                                               | 0.048                                                               | 0.069                                                                                                   |
| <i>wR</i> <sub>2</sub> ( <i>I</i> > 2 $\sigma$ ( <i>I</i> ))             | 0.058                                               | 0.081                                                               | 0.144                                                                                                   |
| <i>wR</i> <sub>2</sub> (all data)                                        | 0.060                                               | 0.099                                                               | 0.150                                                                                                   |
| Diff.Fourier.peaks min/max, eÅ <sup>-3</sup>                             | -0.33 / 0.69                                        | -0.70 / 0.77                                                        | -0.98 / 2.33                                                                                            |
| CCDC number                                                              | 1996859                                             | 1996857                                                             | 1996855                                                                                                 |

### 3. NMR spectra of new compounds

We report here multinuclear NMR spectra of all new compounds. In some cases those are the ones from freshly prepared samples prior to work-up, for which quantitative spectroscopic yields were typically observed. In particular, for compounds **1**·GeCl<sub>2</sub>, **1**·Zn(C<sub>6</sub>F<sub>5</sub>) and **3**, using a freshly prepared solution permits to acquire spectra with a higher signal/noise ratio, since the isolated MOLPs exhibit reduce solubility. In the case of **1**·ZnMe<sub>2</sub> work-up was problematic due to the volatility of ZnMe<sub>2</sub>. For all others, the reported spectra are from isolated solids.

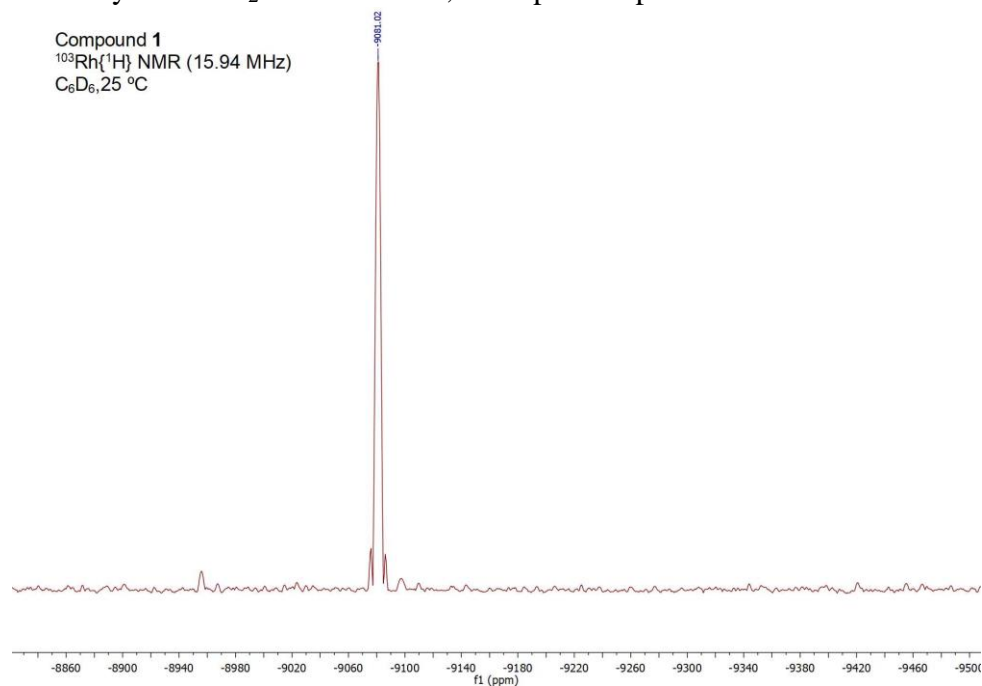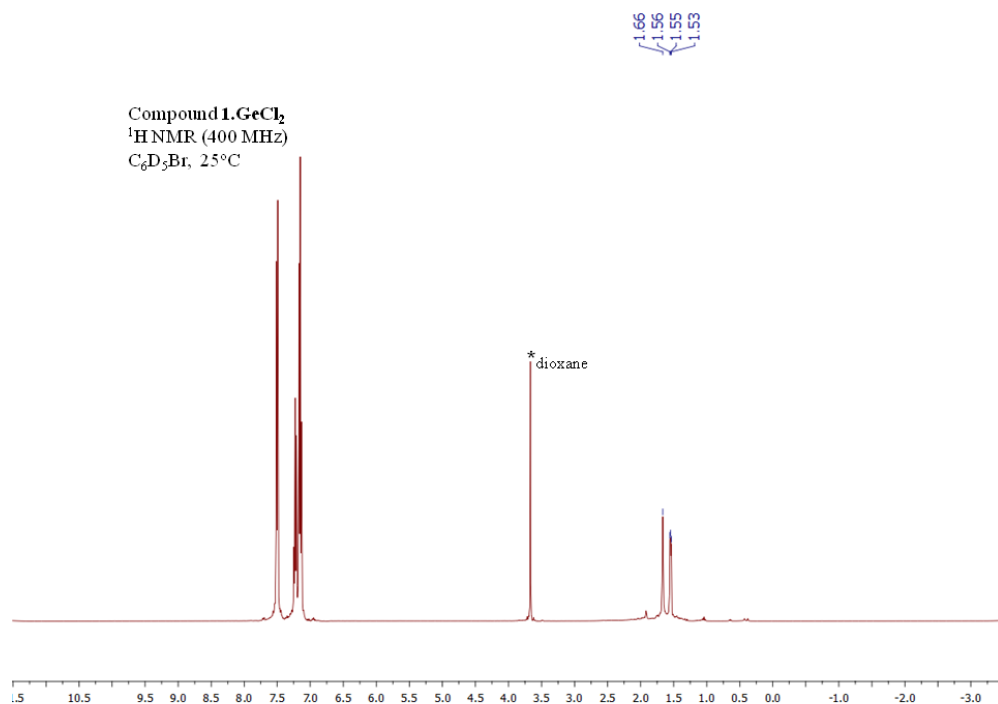

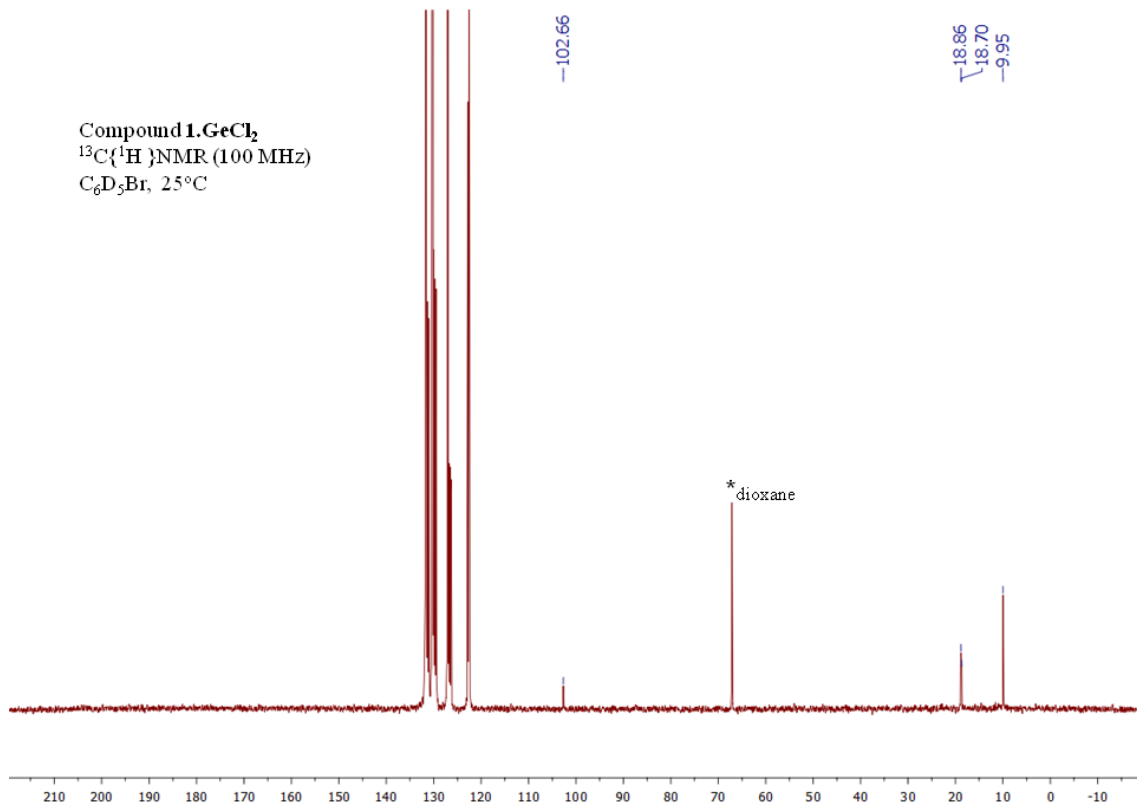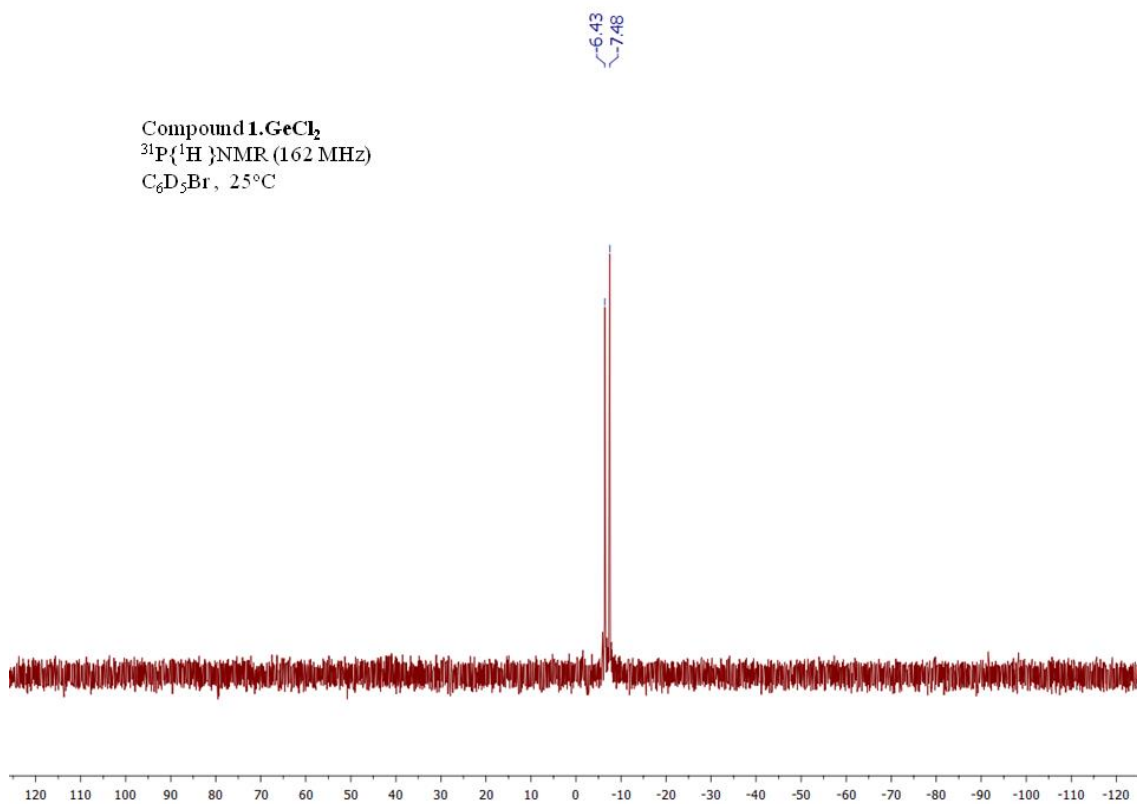



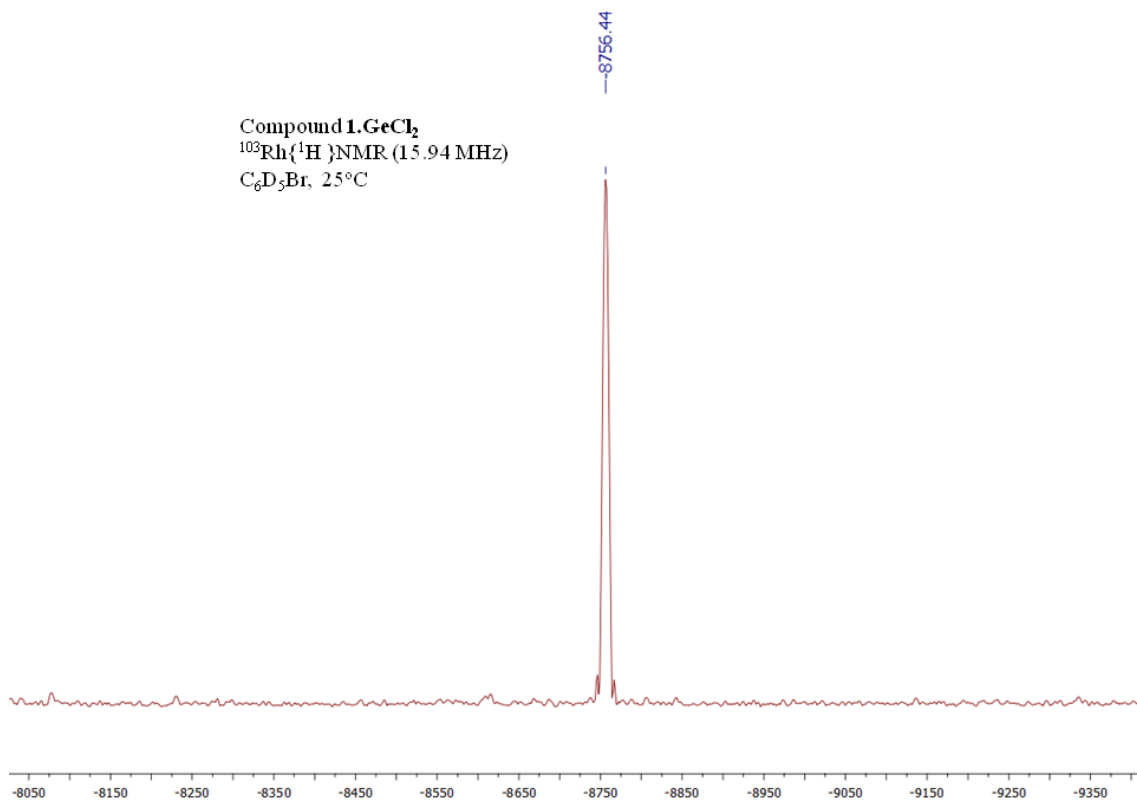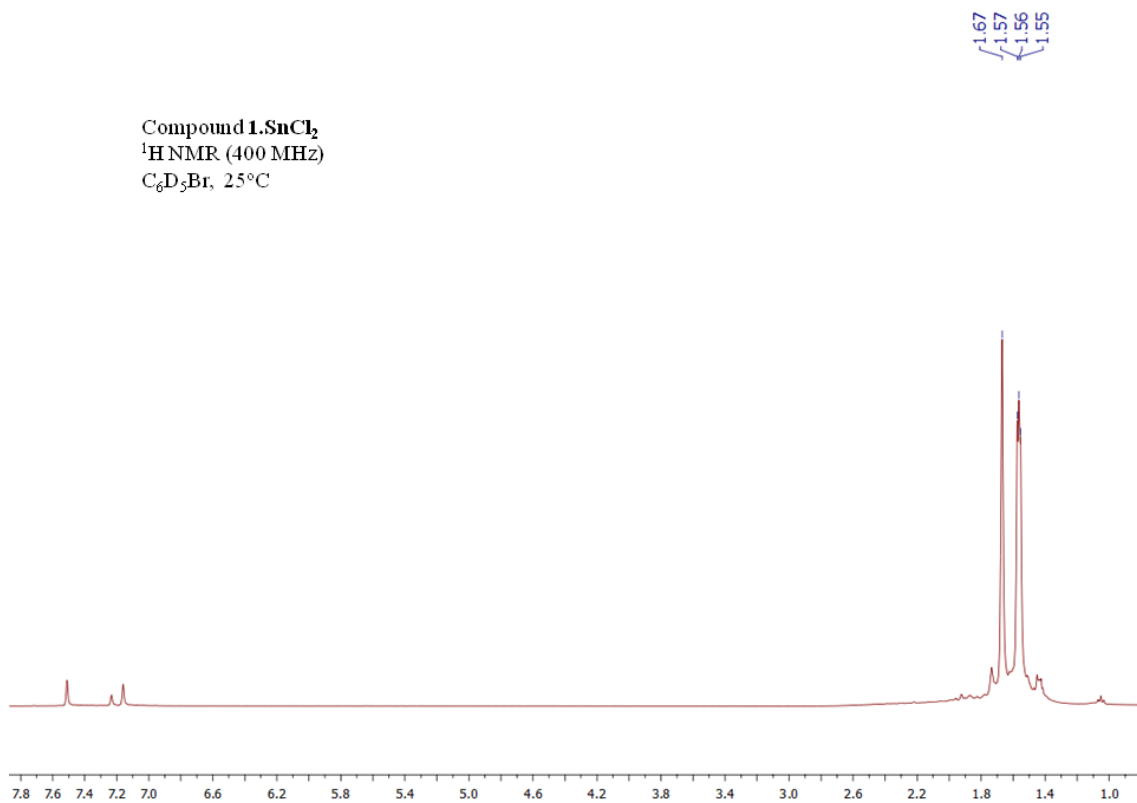

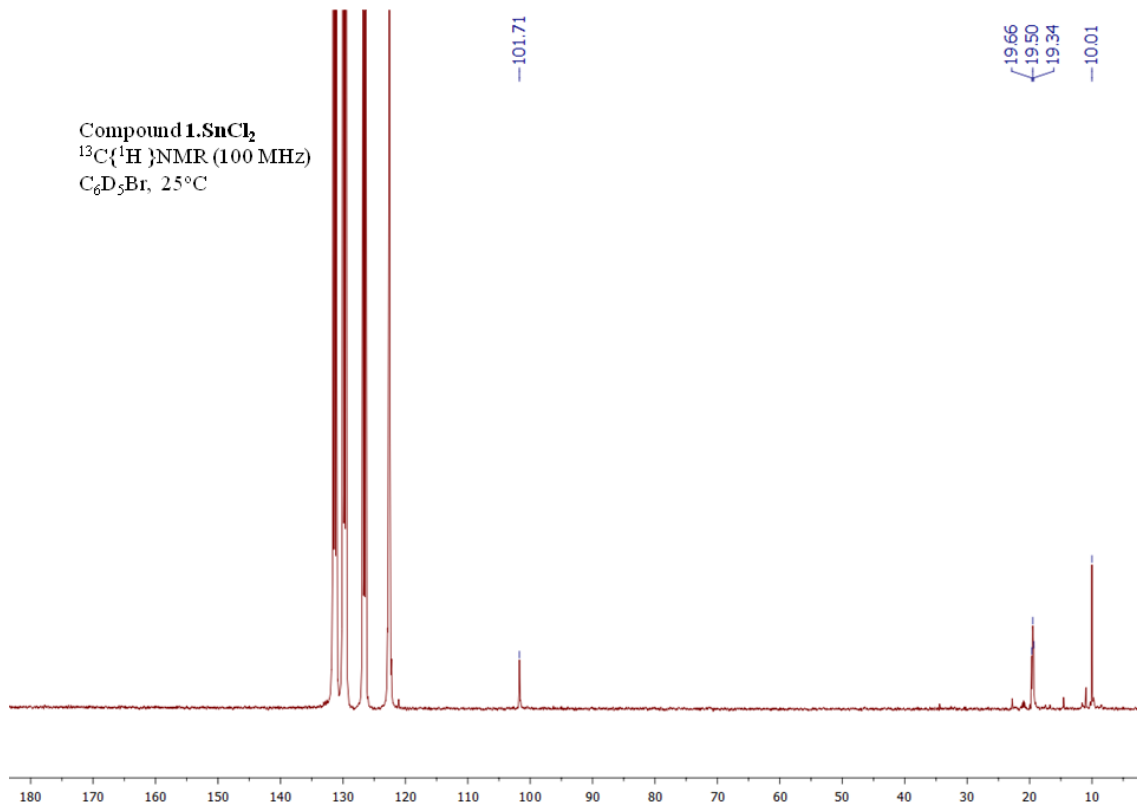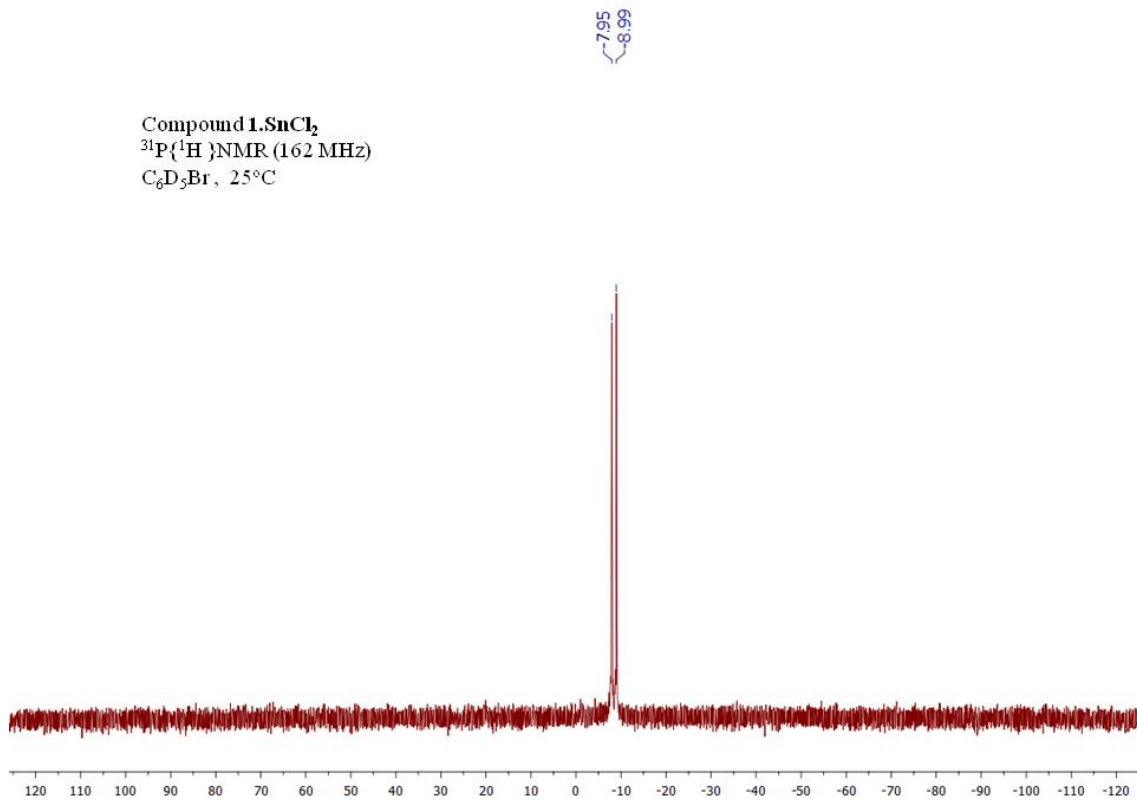

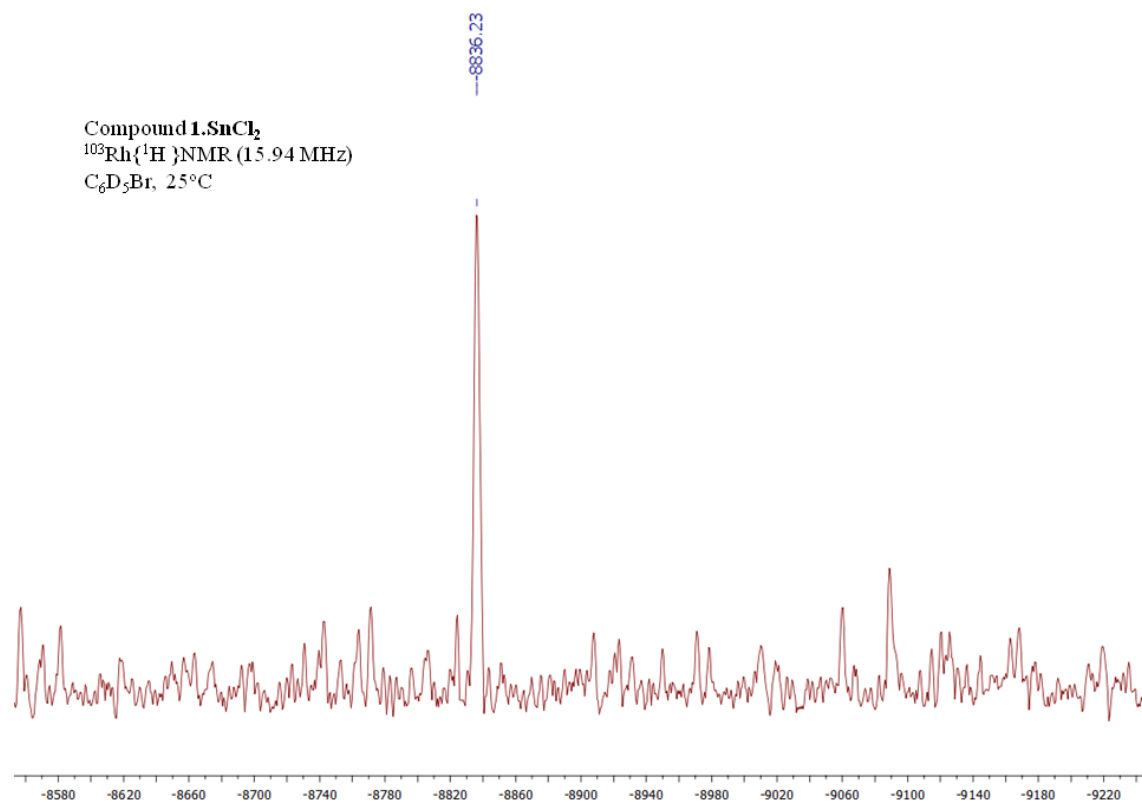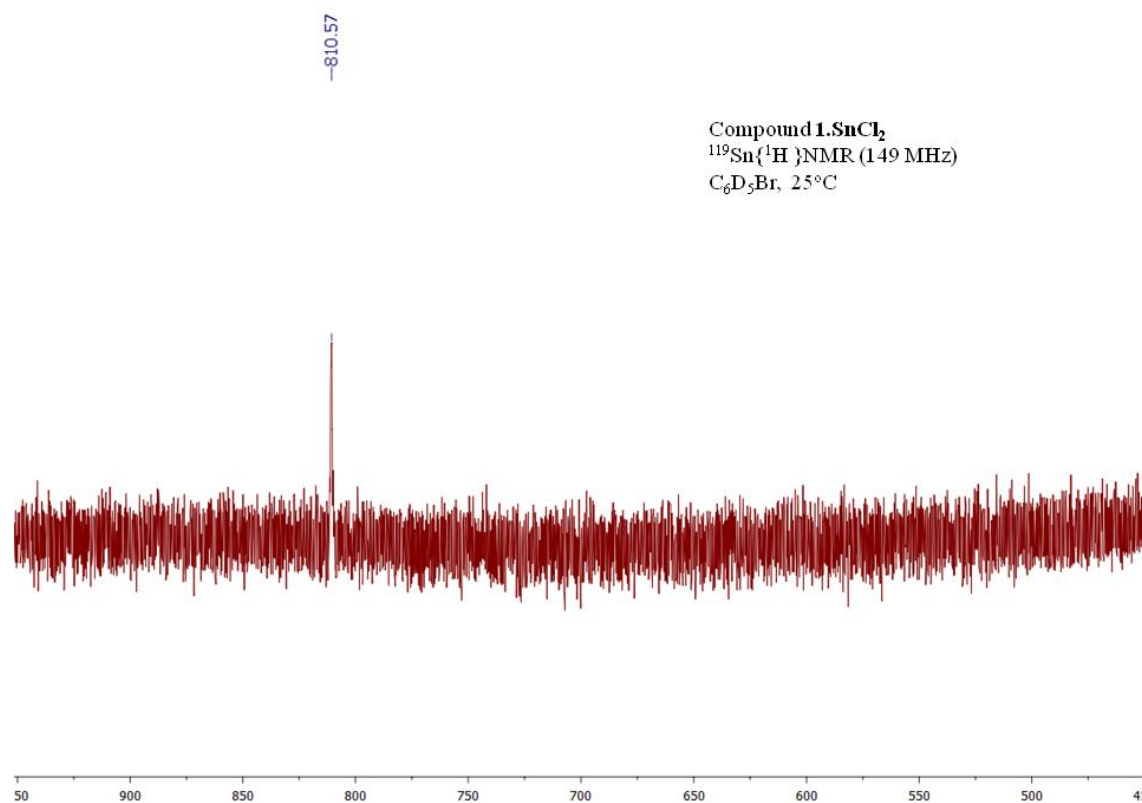

Compound **1**.CuCl  
 $^1\text{H}$ NMR (400 MHz)  
 $\text{C}_6\text{D}_5\text{Br}$ , 25°C

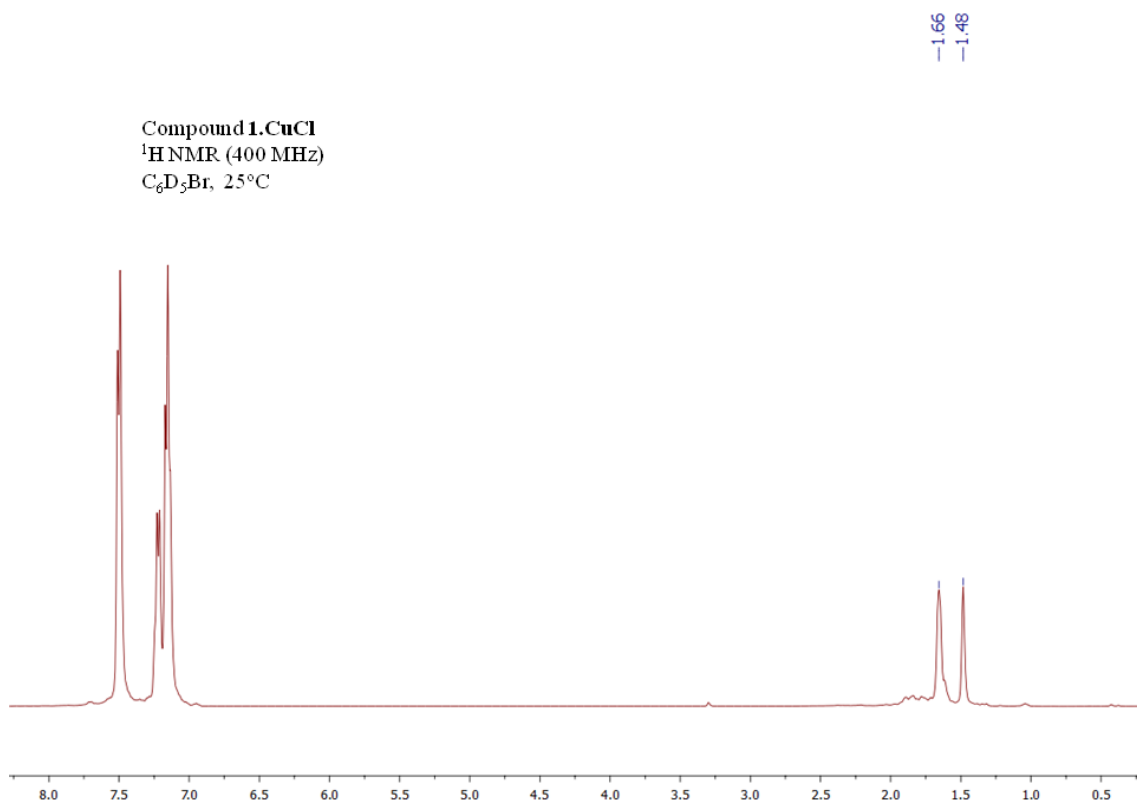

Compound **1**.CuCl  
 $^{13}\text{C}\{^1\text{H}\}$ NMR (100 MHz)  
 $\text{C}_6\text{D}_5\text{Br}$ , 25°C

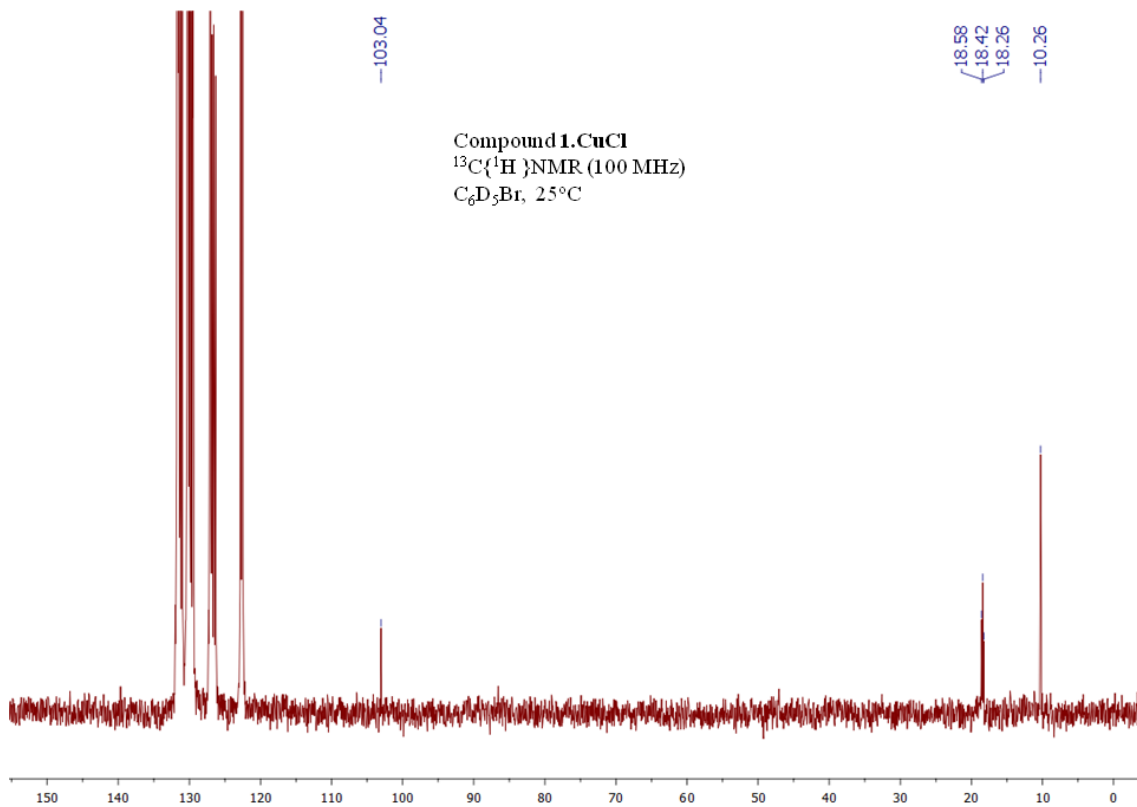

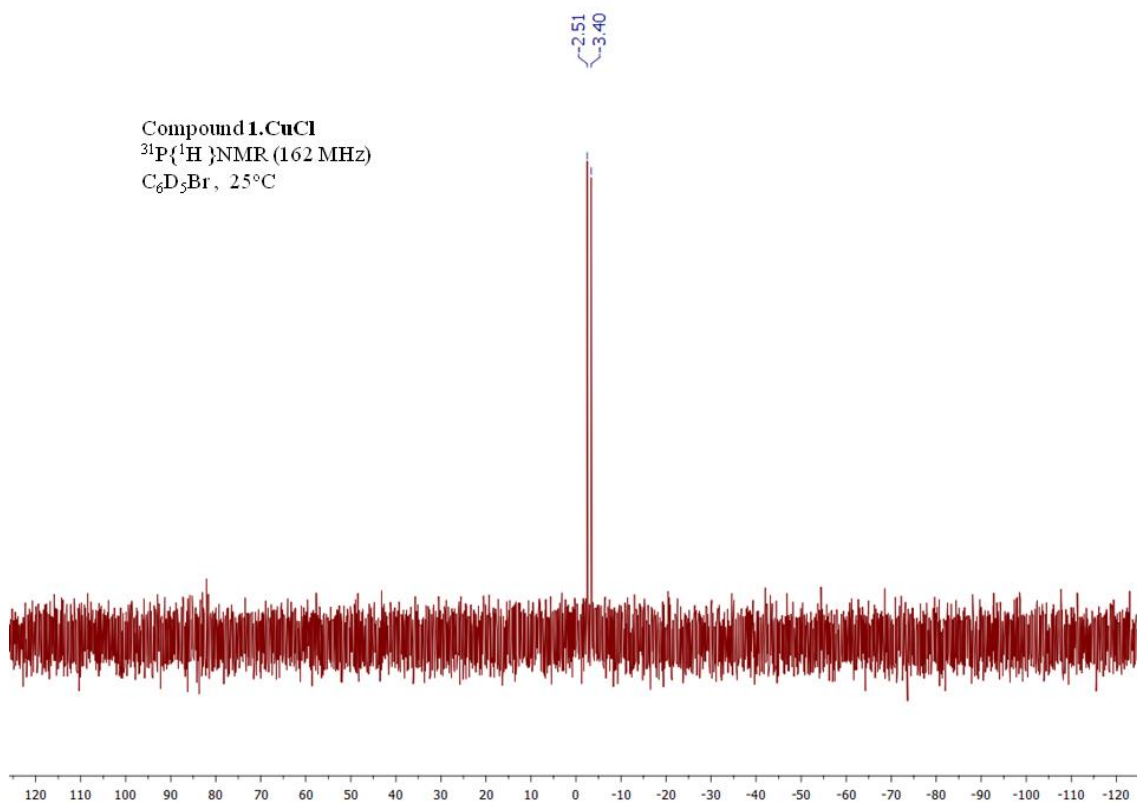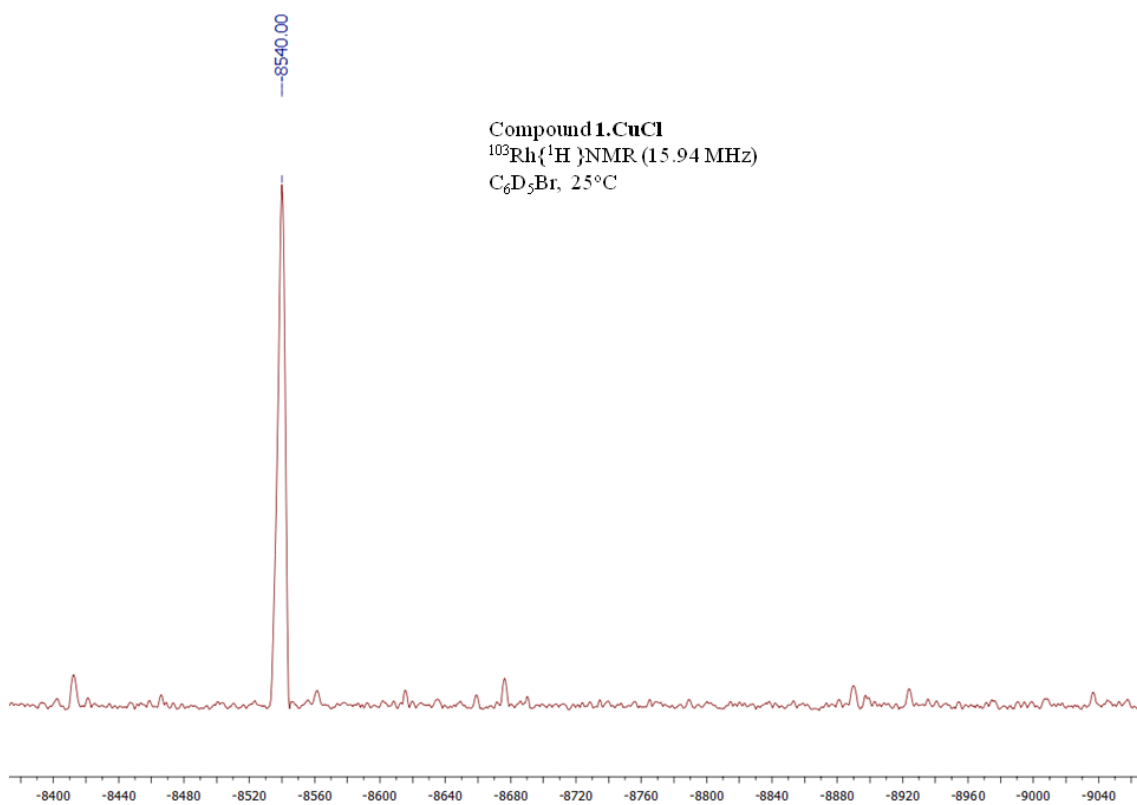

Compound **1**.AlMe<sub>3</sub>  
<sup>1</sup>H NMR (400 MHz)  
C<sub>6</sub>D<sub>6</sub>, 25°C

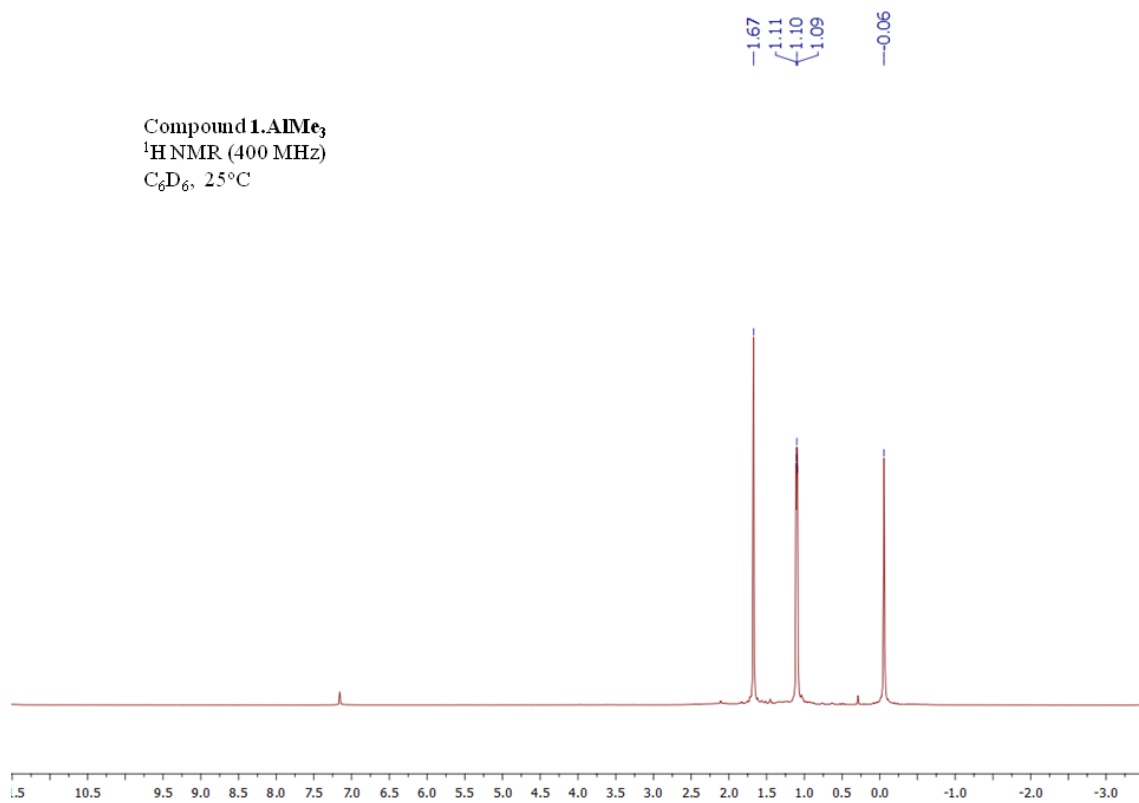

Compound **1**.AlMe<sub>3</sub>  
<sup>13</sup>C{<sup>1</sup>H} NMR (100 MHz)  
C<sub>6</sub>D<sub>6</sub>, 25°C

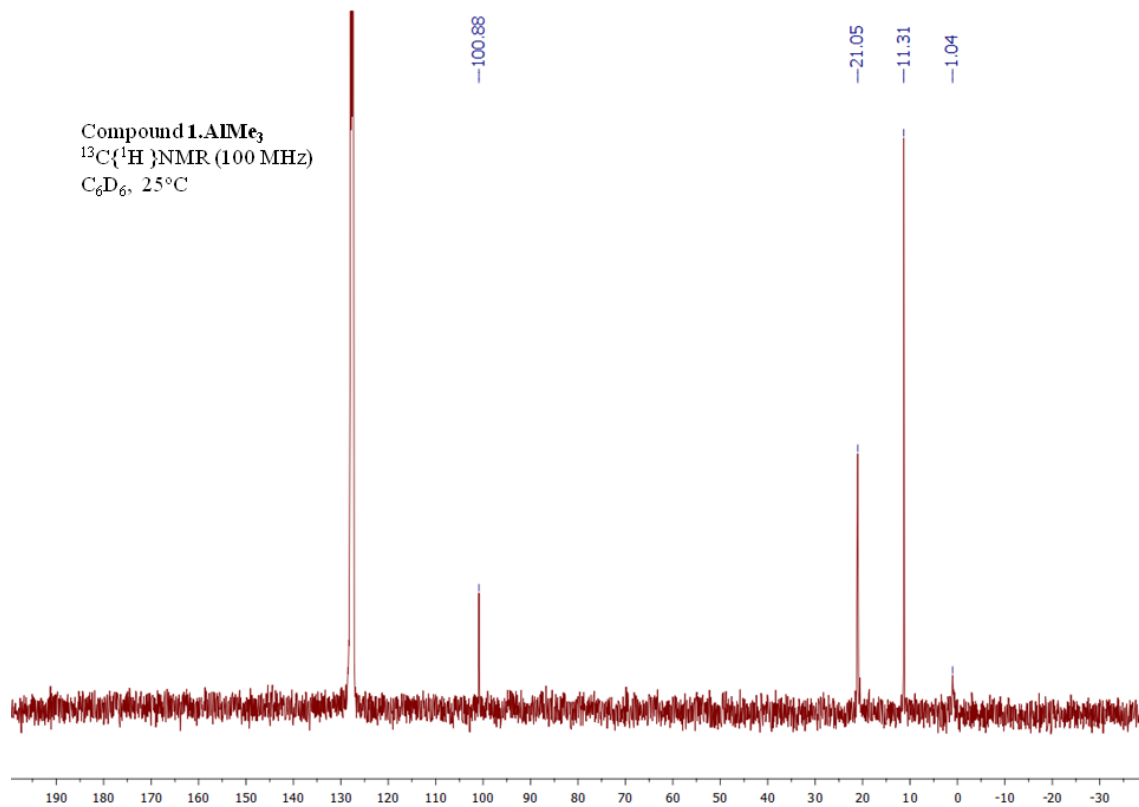

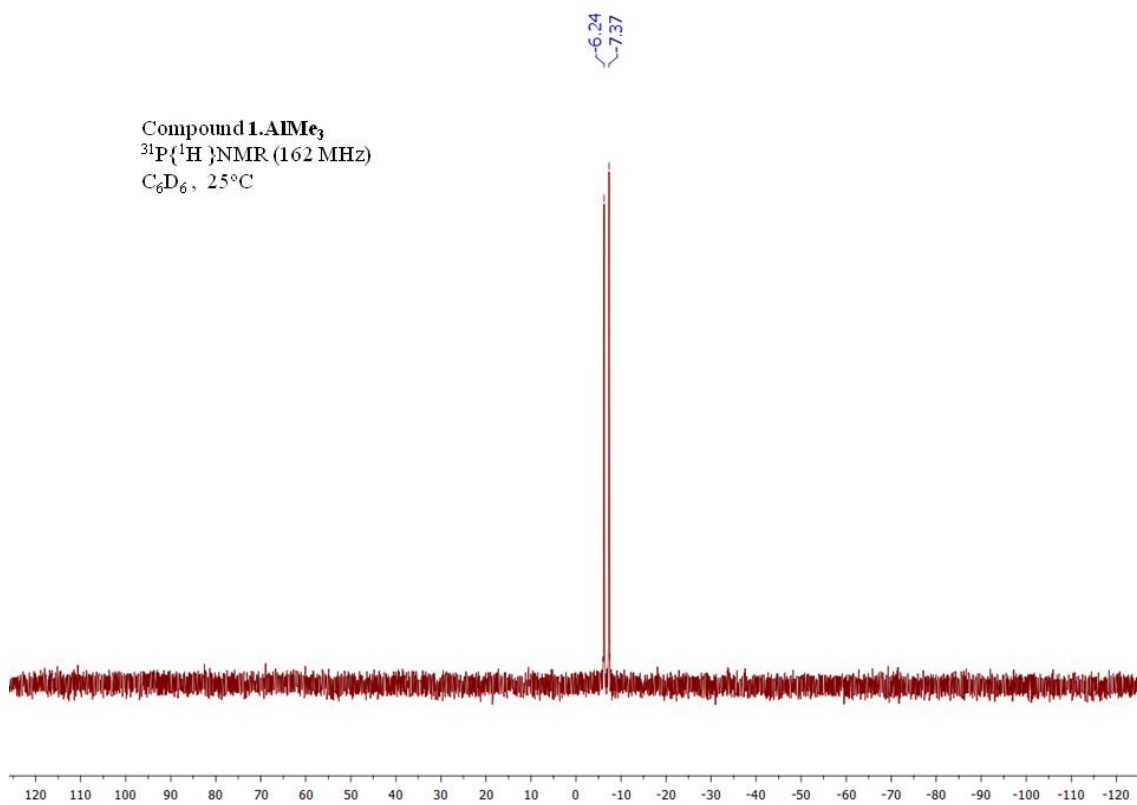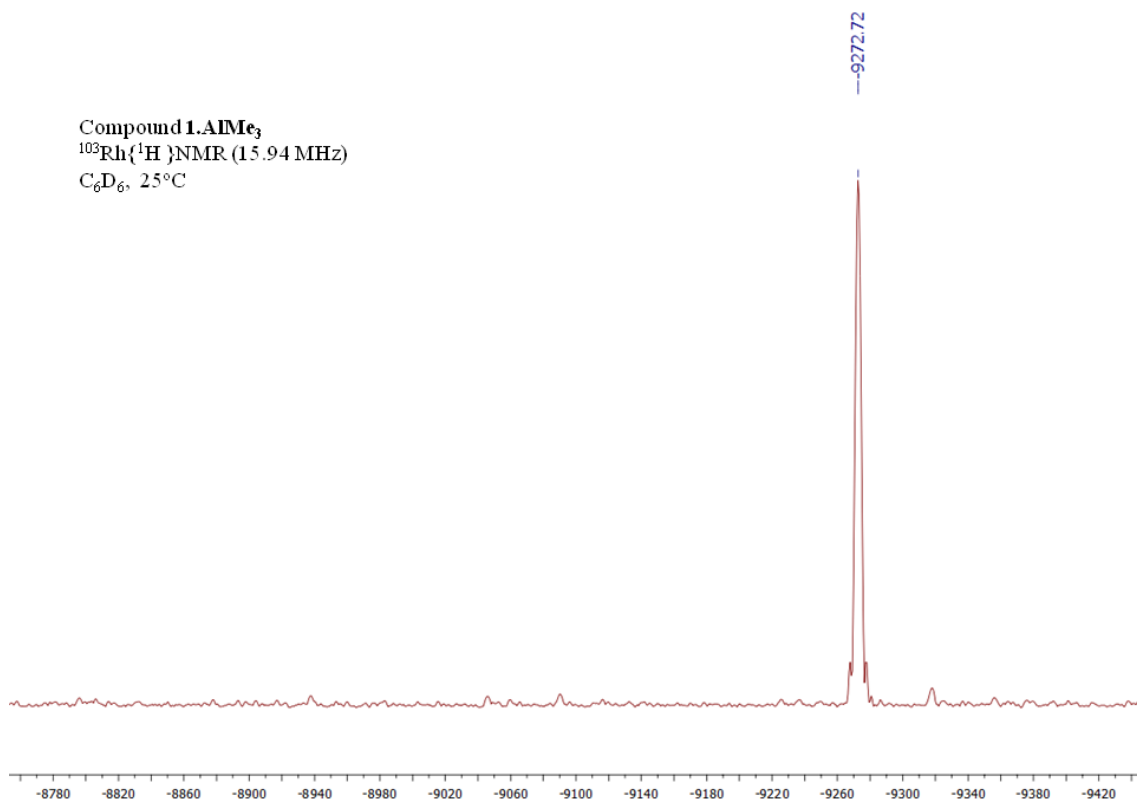

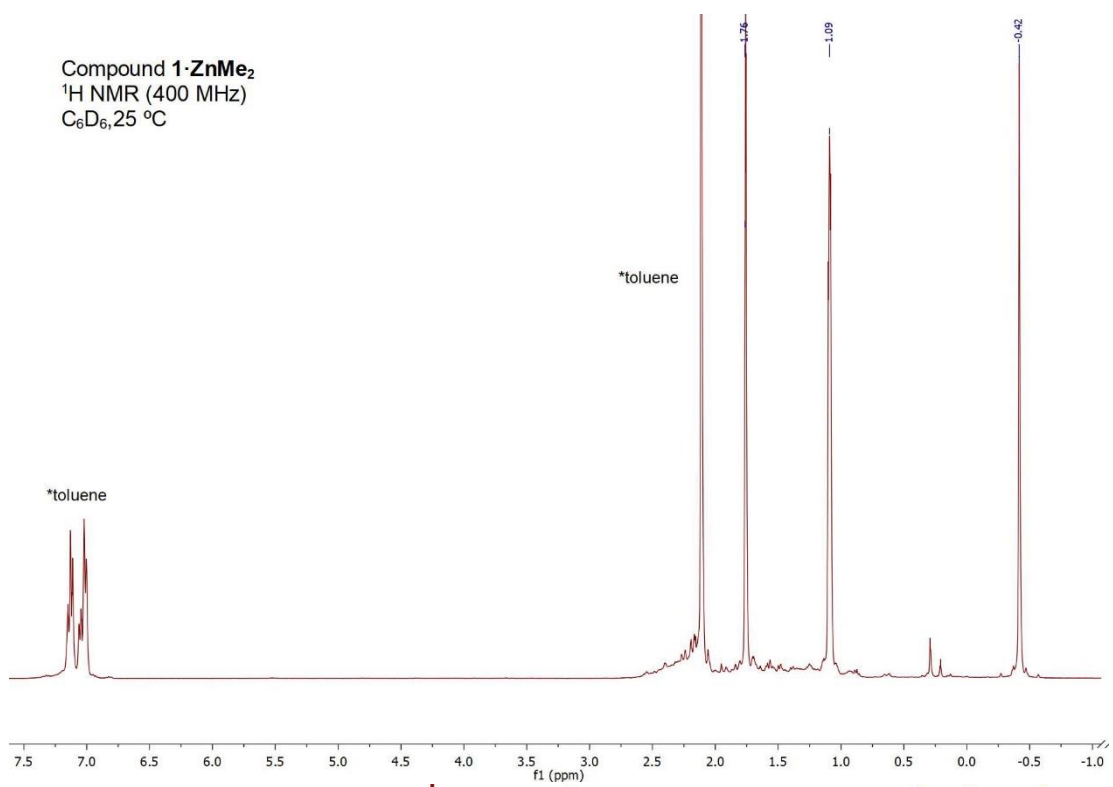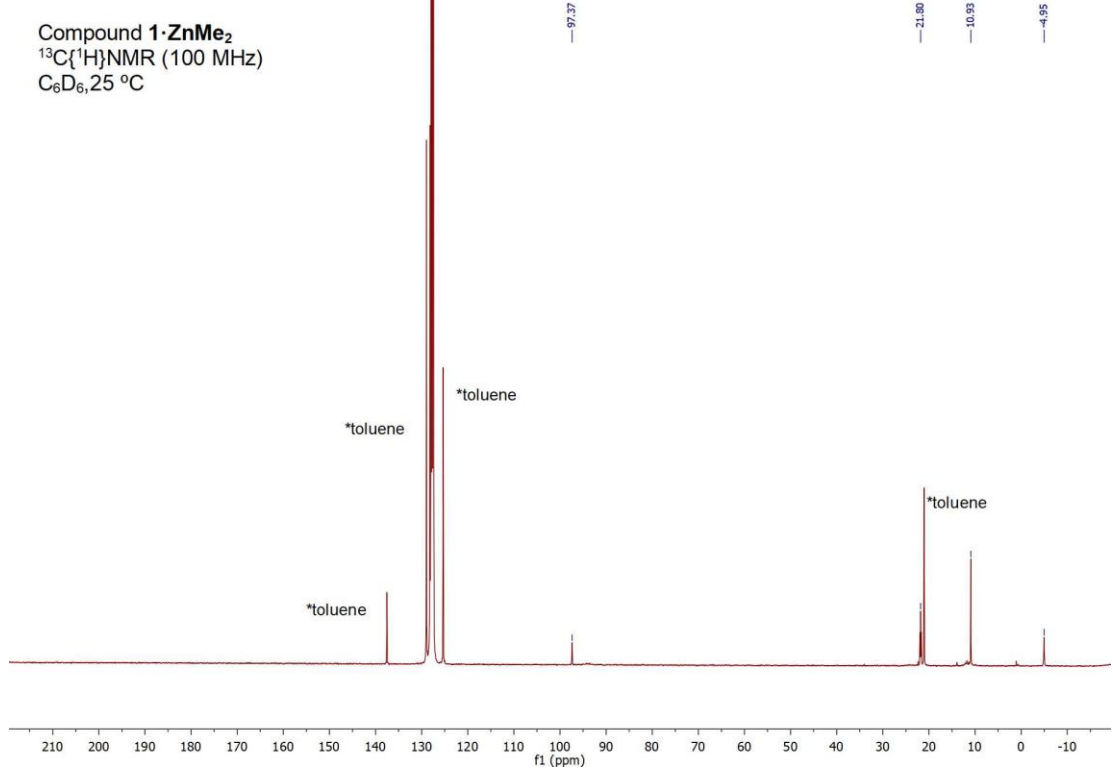



Compound **1·ZnMe<sub>2</sub>**  
<sup>31</sup>P{<sup>1</sup>H}NMR (162 MHz)  
C<sub>6</sub>D<sub>6</sub>, 25 °C

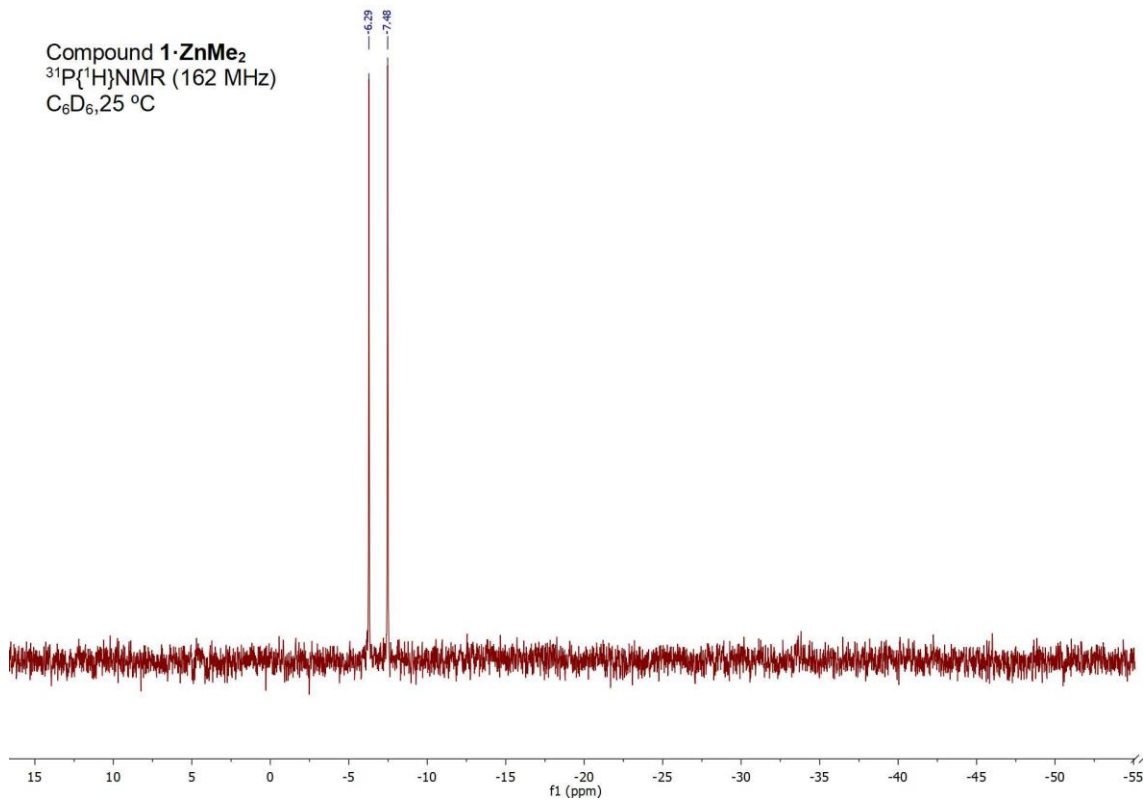

Compound **1·ZnMe<sub>2</sub>**  
<sup>103</sup>Rh{<sup>1</sup>H} NMR (15.94 MHz)  
C<sub>6</sub>D<sub>6</sub>, 25 °C

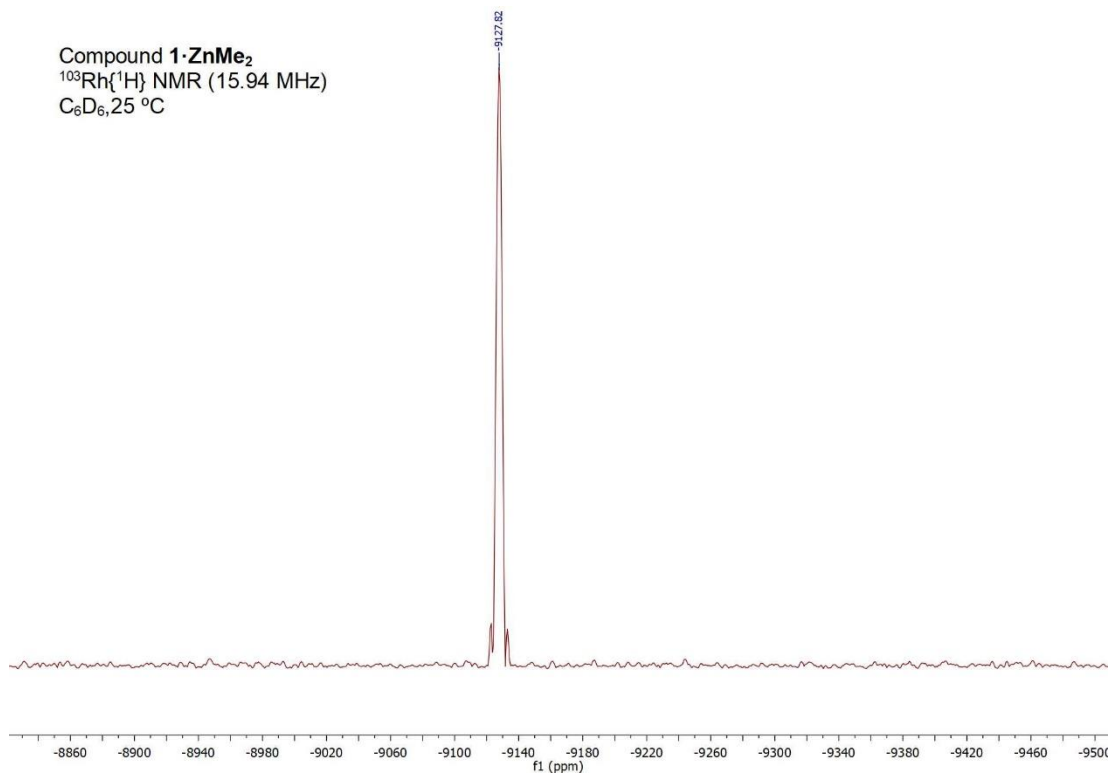

Compound **1**·Zn(C<sub>6</sub>F<sub>5</sub>)<sub>2</sub>  
<sup>1</sup>H NMR (400 MHz)  
C<sub>6</sub>D<sub>6</sub>, 25 °C

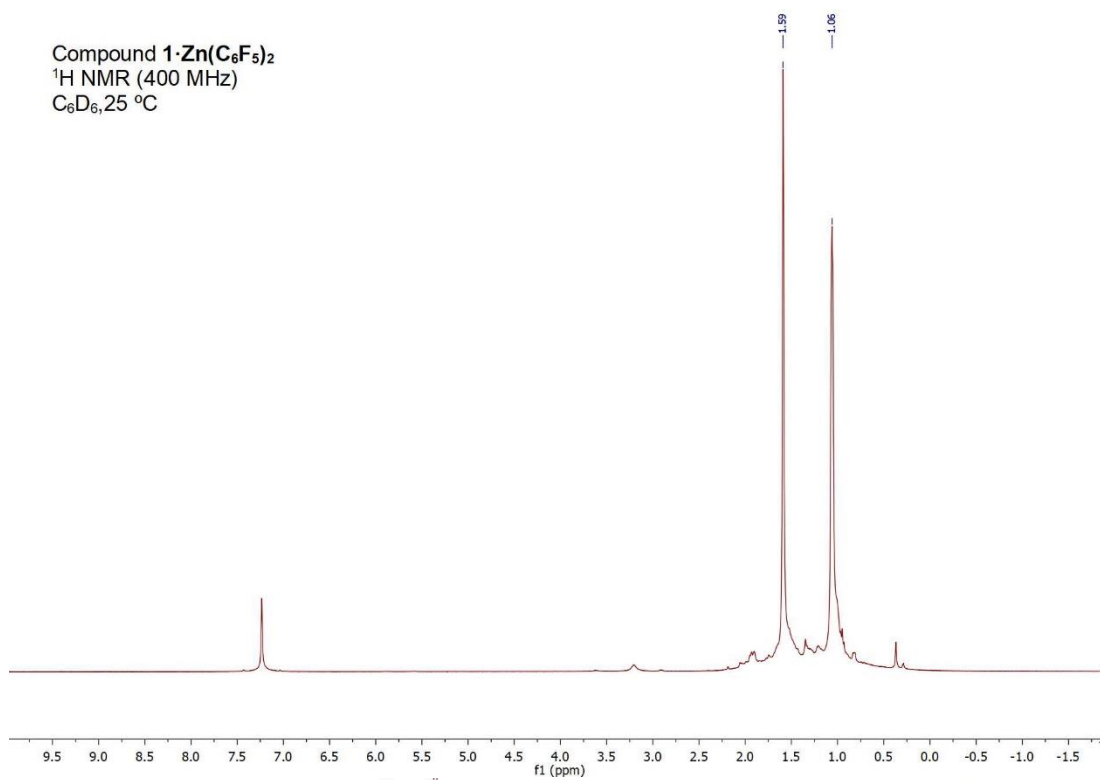

Compound **1**·Zn(C<sub>6</sub>F<sub>5</sub>)<sub>2</sub>  
<sup>13</sup>C{<sup>1</sup>H} NMR (100 MHz)  
C<sub>6</sub>D<sub>6</sub>, 25 °C

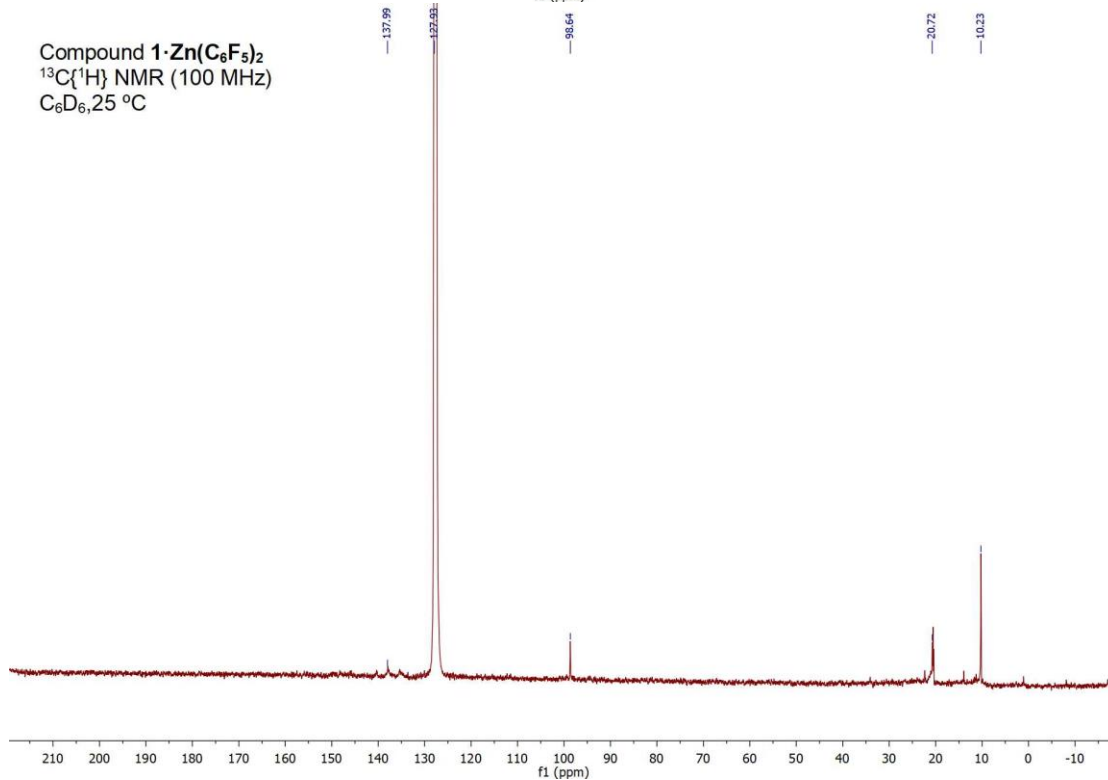

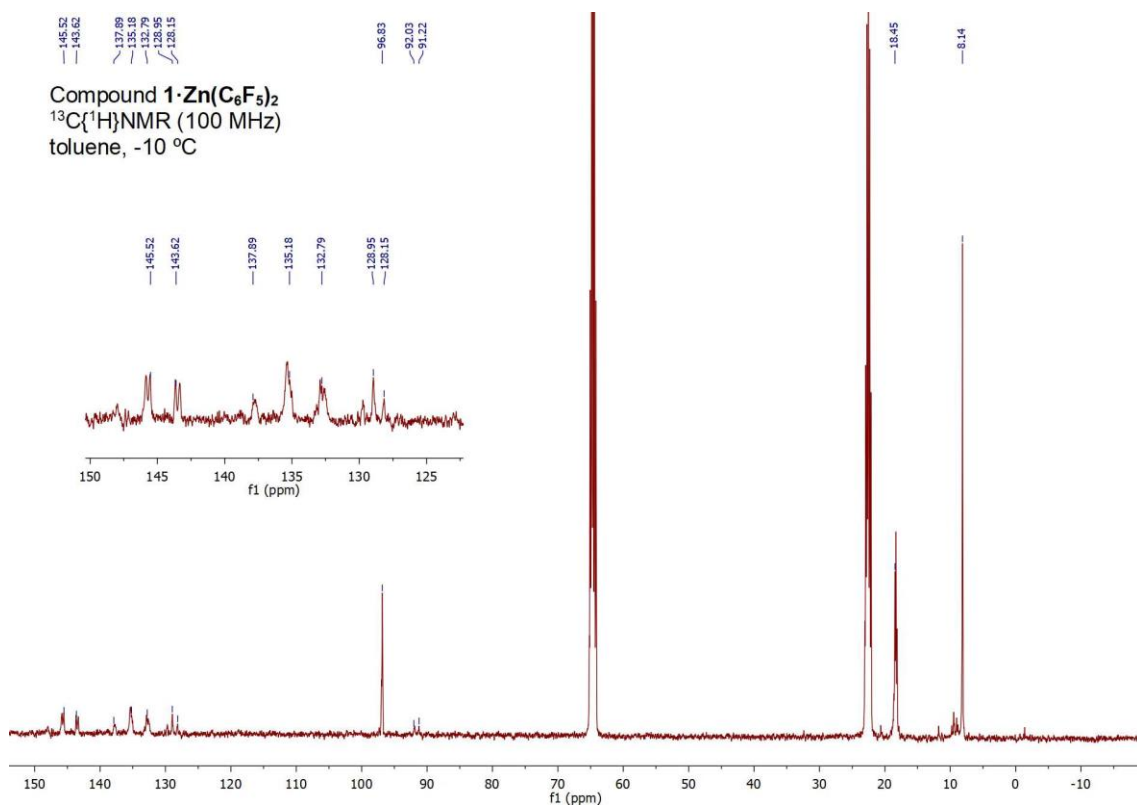

Figure. Carbon NMR spectrum of  $\text{RhCp}^*(\text{PMe})_3\text{Zn}(\text{C}_6\text{F}_5)_2$ . With a apliation of the signal corresponding with the carbon of  $\text{C}_6\text{F}_5$  ligand.

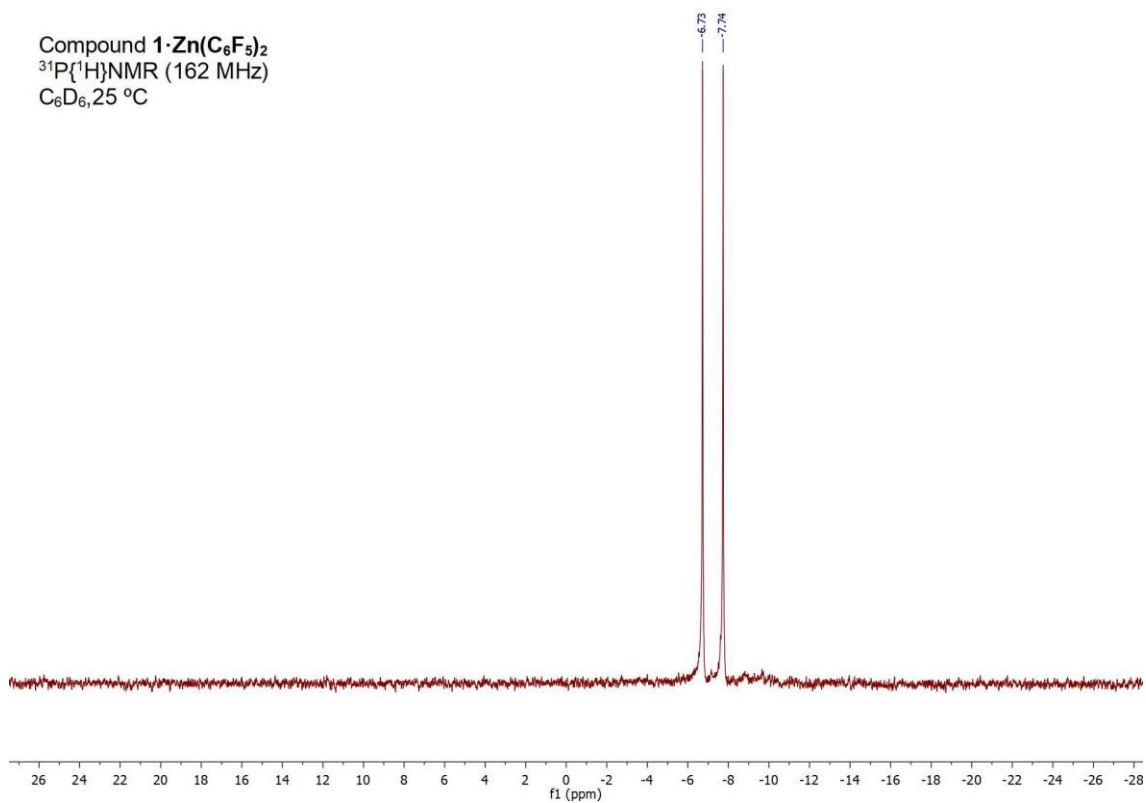

Compound **1**·Zn(C<sub>6</sub>F<sub>5</sub>)<sub>2</sub>  
<sup>19</sup>F{<sup>1</sup>H}NMR (376 MHz)  
C<sub>6</sub>D<sub>6</sub>, 25 °C

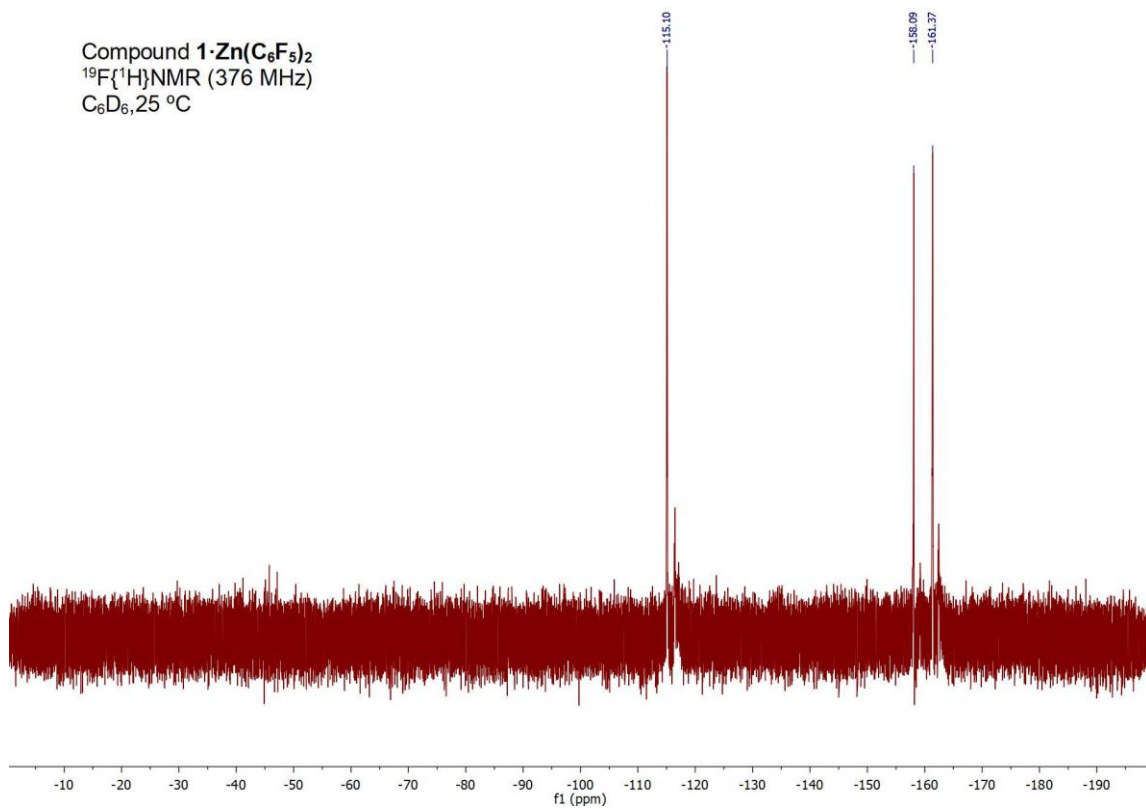

Compound [RhCp\*(H)(PMe<sub>3</sub>)<sub>2</sub>]PF<sub>6</sub>  
<sup>1</sup>H NMR (400MHz)  
THF, 25 °C

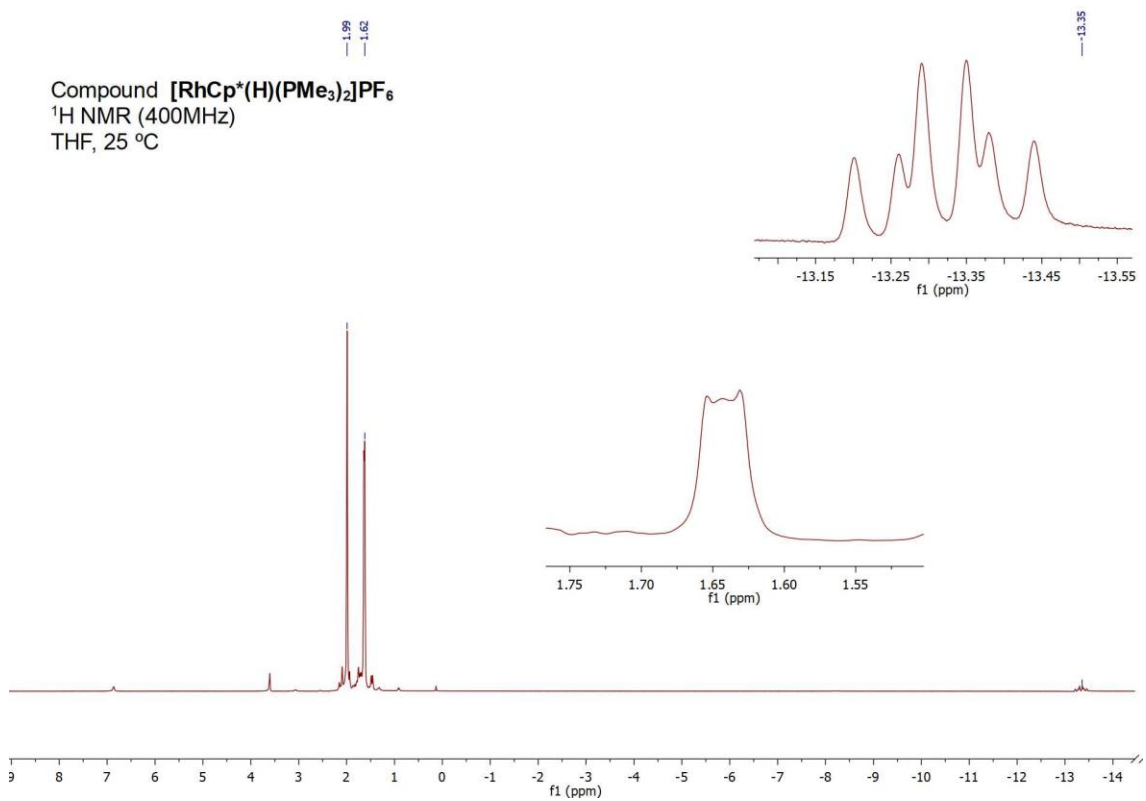

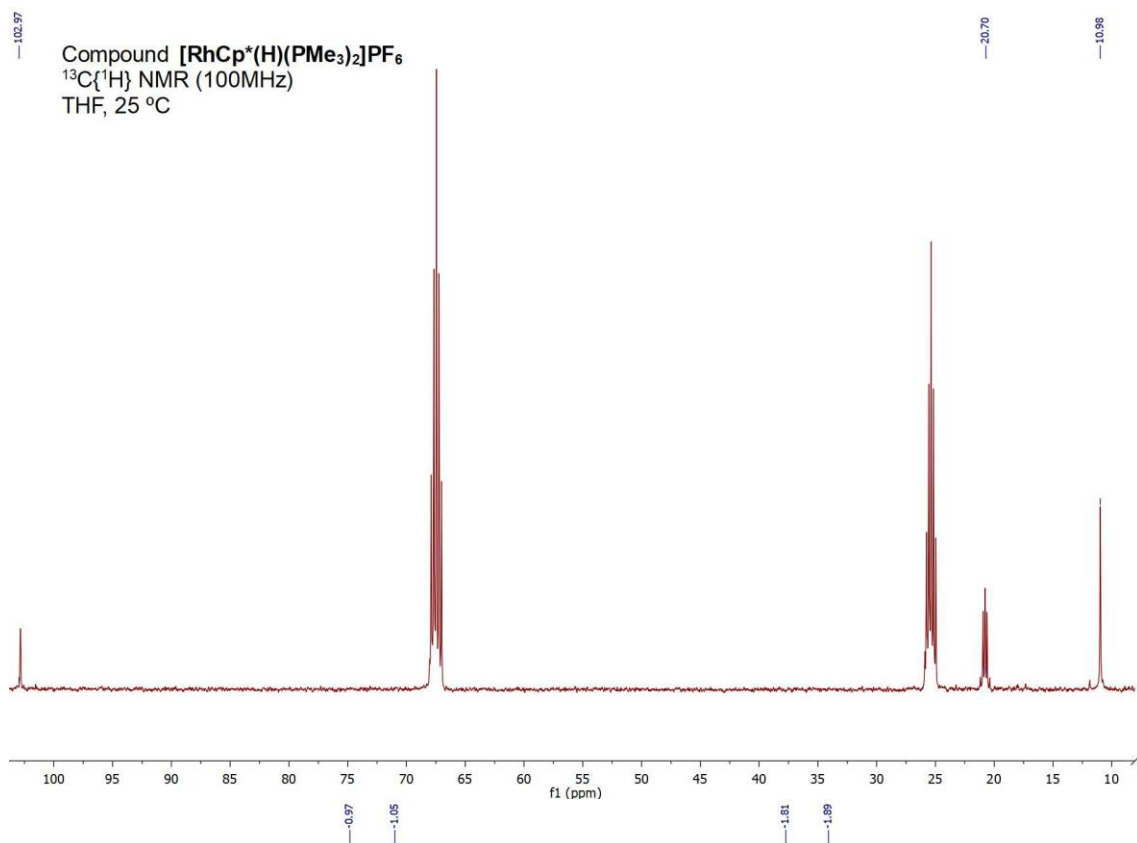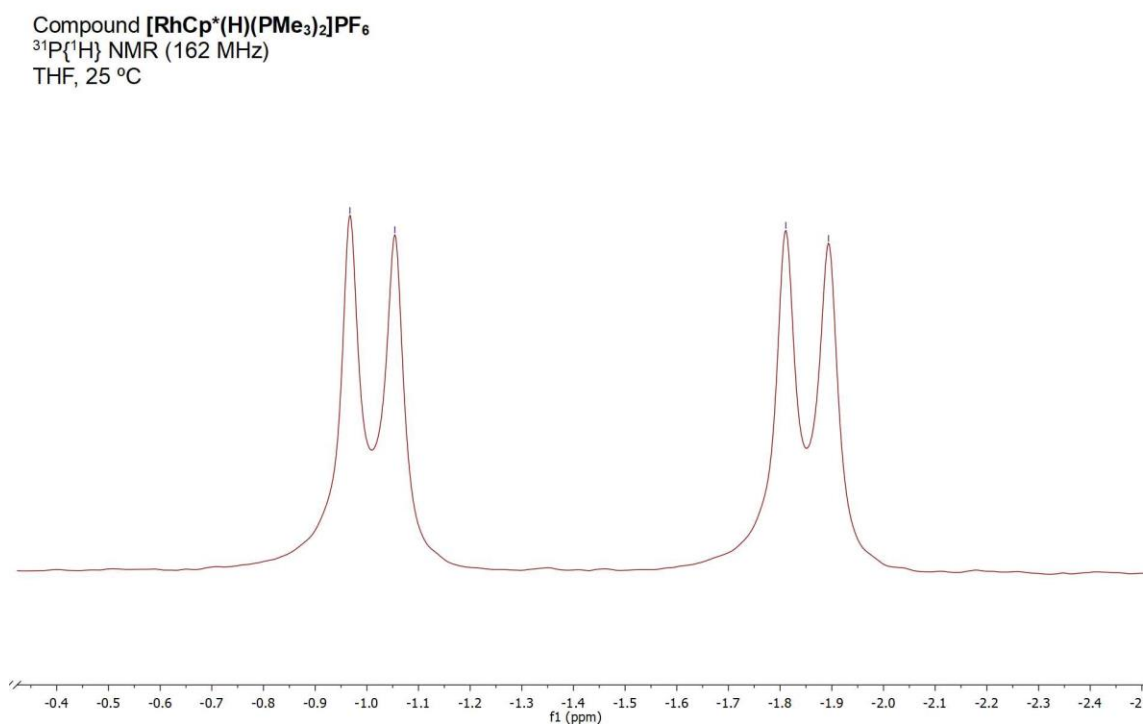

Compound 3  
 $^1\text{H}$  NMR (400 MHz)  
 $\text{C}_6\text{D}_6$ , 25 °C

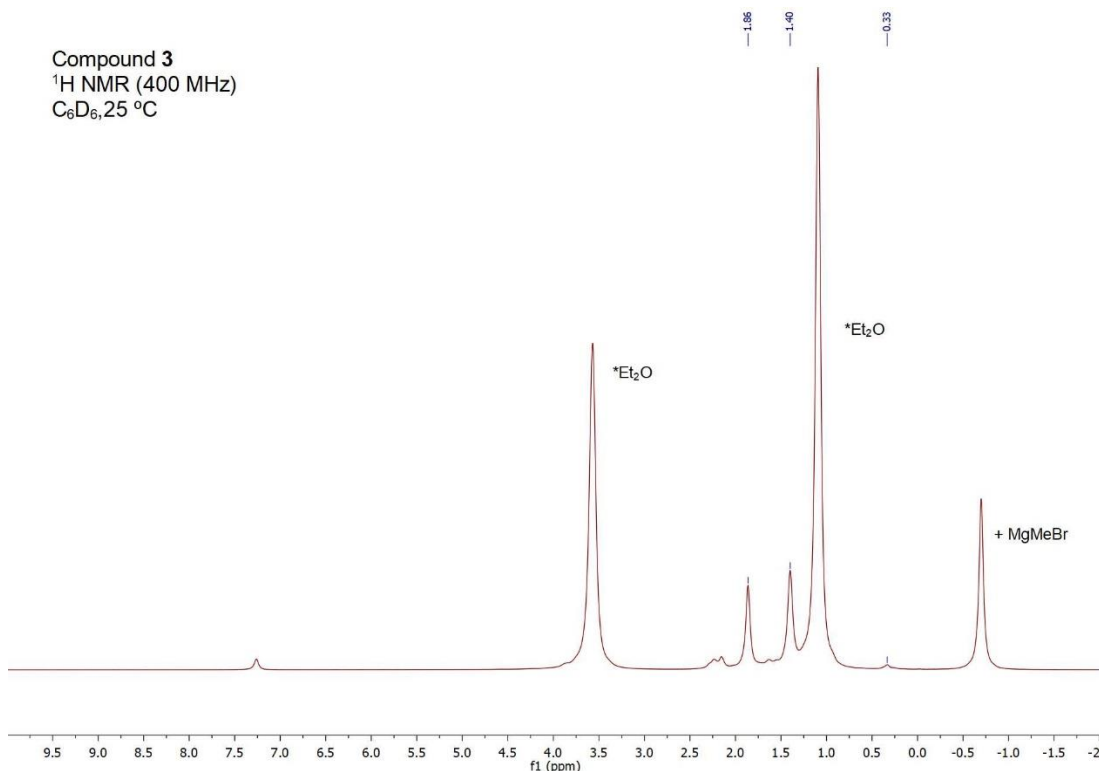

Compound 3  
 $^{13}\text{C}\{^1\text{H}\}$  NMR (100 MHz)  
 $\text{C}_6\text{D}_6$ , 25 °C

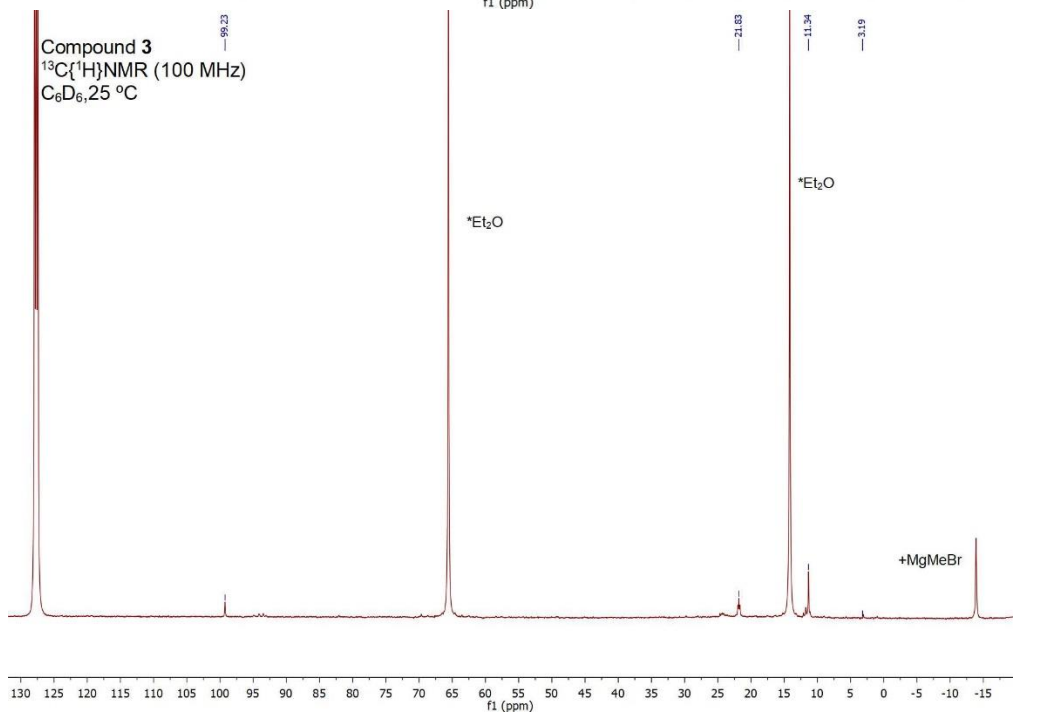

Compound 3  
 $^{31}\text{P}\{^1\text{H}\}$  NMR (162 MHz)  
 $\text{C}_6\text{D}_6$ , 25 °C

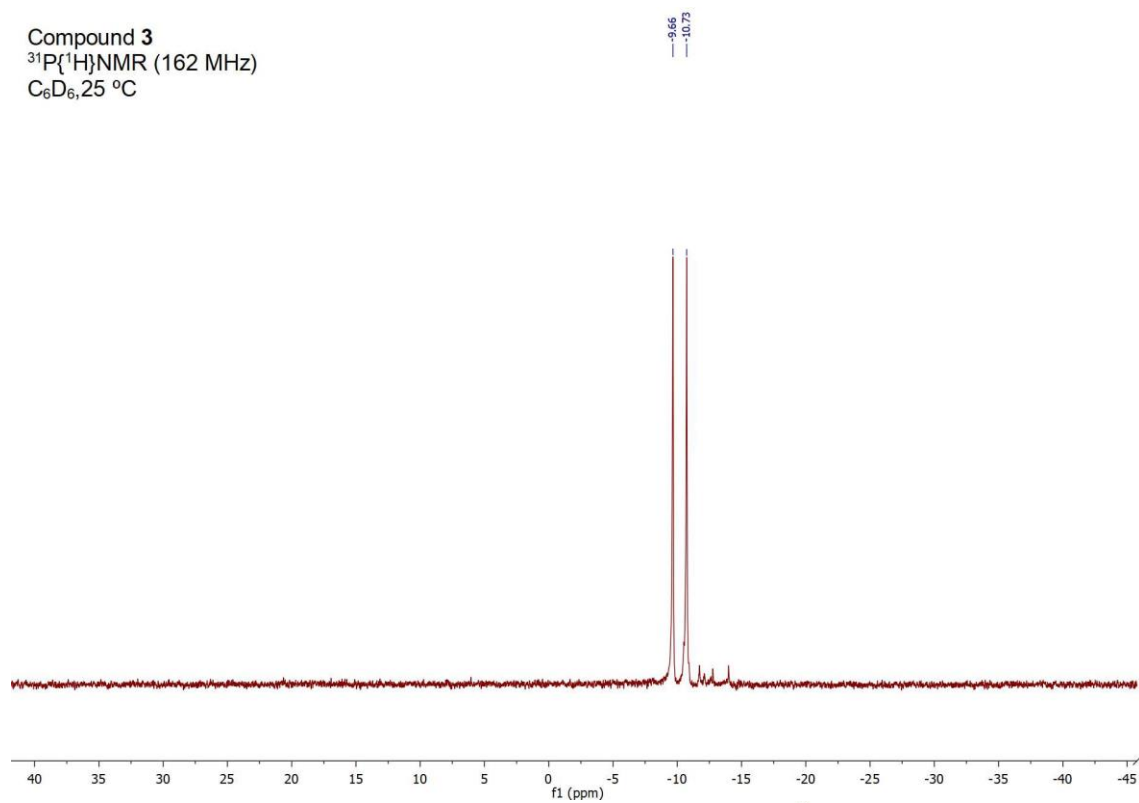

Compound 3  
 $^{103}\text{Rh}\{^1\text{H}\}$  NMR (15.94 MHz)  
 $\text{C}_6\text{D}_6$ , 25 °C

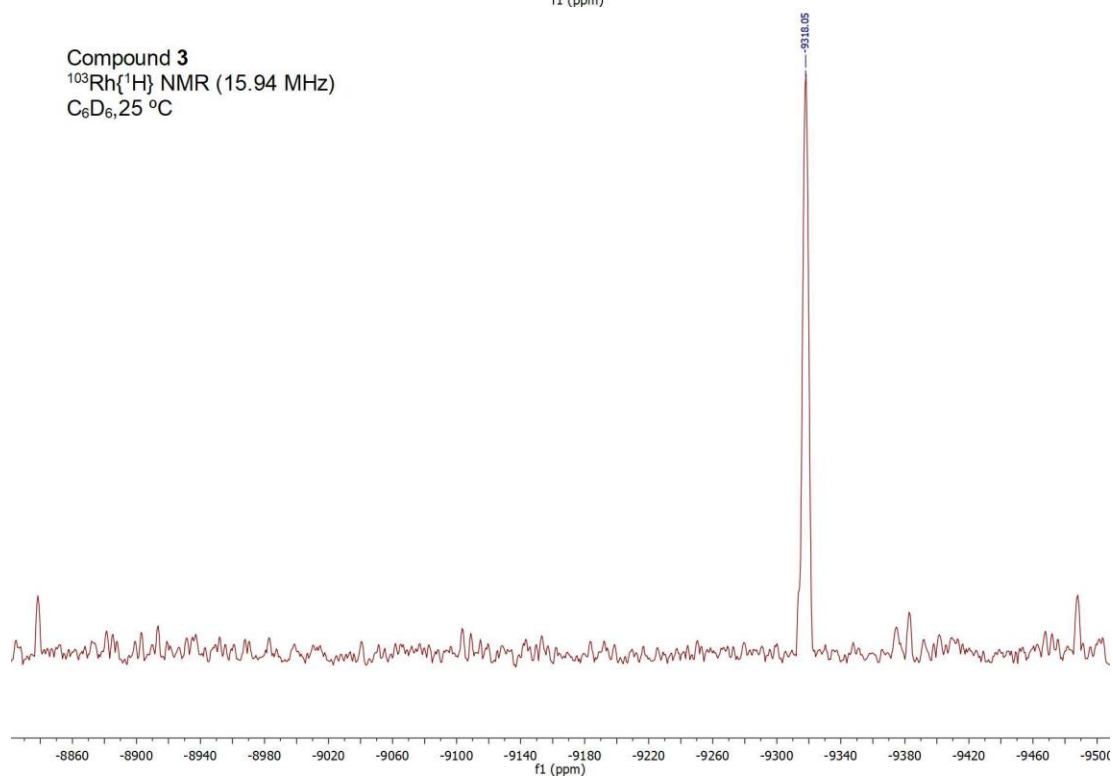

## 4. Additional Computational Results

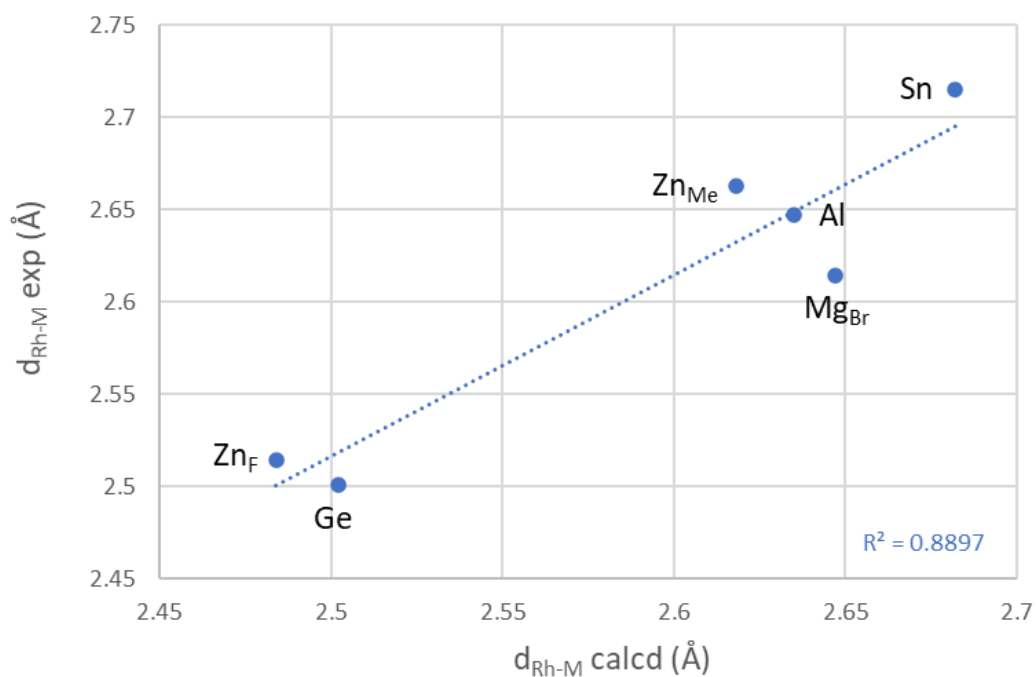

**Figure S1.** Correlation between the experimental and calculated Rh—M distances.

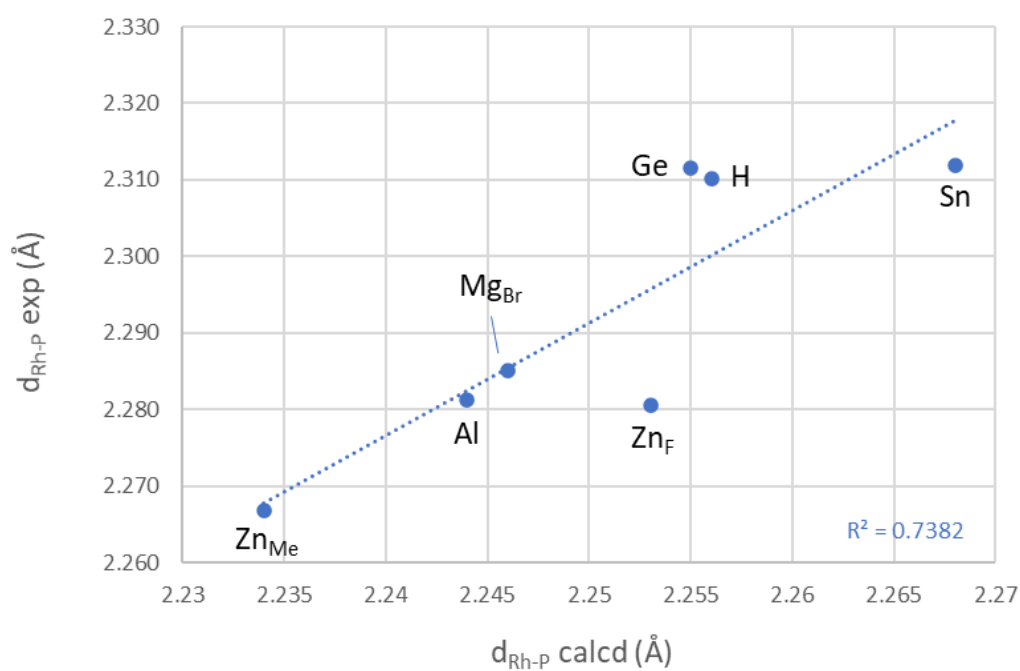

**Figure S2.** Correlation between the experimental and calculated Rh—P distances.



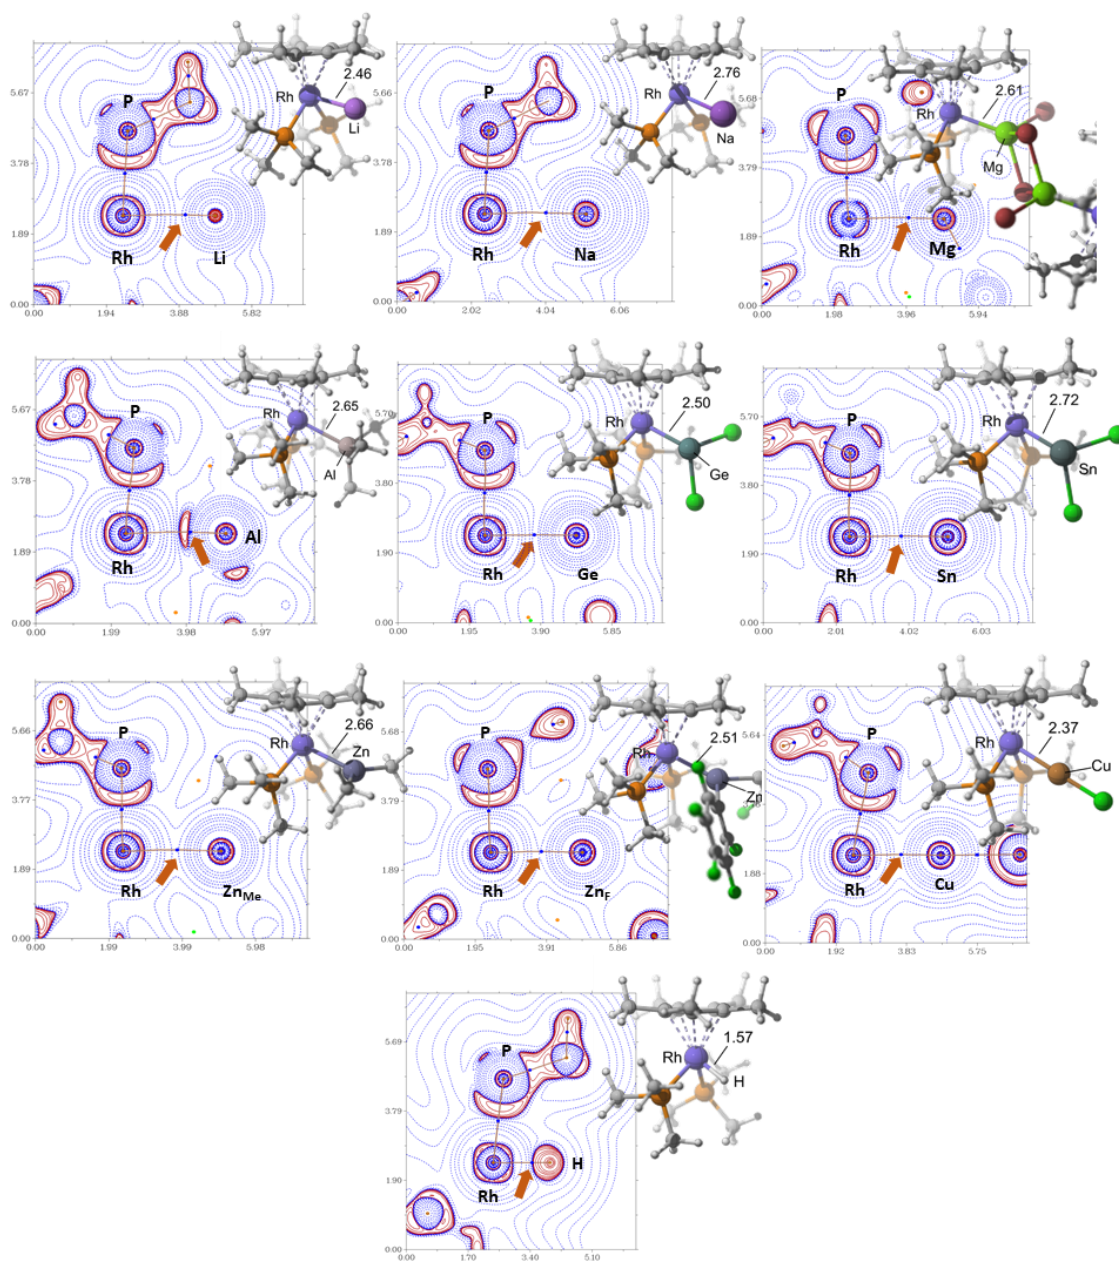

**Figure S3.** BCPs (blue dots) and bond paths (orange trace) of the electron density of the species considered in this study superimposed on the function  $L = -\nabla^2\rho_b$  in one of the M—Rh—P planes. The orange arrows point to the Rh—M BCPs. Dotted blue and solid red contour lines are for positive and negative values of  $L$ . The optimized geometries of the adducts are also shown. Distances are in Å.

**Table S3.** QTAIM indicators at Rh(I)—M BCPs. All data are in atomic units unless said otherwise.  $\rho_b$  electron density ( $e \cdot \text{bohr}^{-3}$ );  $H_b$  total energy density ( $\text{hartree} \cdot \text{bohr}^{-3}$ );  $\nabla^2 \rho_b$  Laplacian of the electron density ( $e \cdot \text{bohr}^{-5}$ );  $|V_b|/G_b$  ratio between the absolute electronic potential energy and kinetic energy densities;  $\lambda_i$  eigenvalues of the Hessian matrix;  $\epsilon_b$  (ellipticity) ratio between the largest and smallest negative eigenvalues of the Hessian - 1.

|                                                   | bond            | $\rho(r)$ | $\rho(r)$ ( $e \cdot \text{\AA}^{-3}$ ) | $G_b$  | $V_b$   | $H_b$   | $ V_b /G_b$ | $G_b/\rho(r_b)$ | $\nabla^2 \rho_b$ | $\nabla^2 \rho_b$ ( $e \cdot \text{\AA}^{-5}$ ) | $\lambda_3$ | $\lambda_2$ | $\lambda_1$ | $\epsilon_b$ |
|---------------------------------------------------|-----------------|-----------|-----------------------------------------|--------|---------|---------|-------------|-----------------|-------------------|-------------------------------------------------|-------------|-------------|-------------|--------------|
| <b>RhCp (1)</b>                                   | Rh-P (average)  | 0.1066    | 0.7192                                  | 0.0870 | -0.1329 | -0.0459 | 1.527       | 0.8166          | 0.1647            | 3.9694                                          | 0.3283      | -0.0832     | -0.0804     | 0.035        |
| <b>H (hydride)</b>                                | Rh-H            | 0.1505    | 1.0153                                  | 0.0974 | -0.1924 | -0.0950 | 1.975       | 0.6475          | 0.0098            | 0.2366                                          | 0.5288      | -0.2602     | -0.2587     | 0.006        |
|                                                   | Rh-P (average)  | 0.1014    | 0.6842                                  | 0.0703 | -0.1122 | -0.0420 | 1.597       | 0.6930          | 0.1132            | 2.7281                                          | 0.2825      | -0.0854     | -0.0839     | 0.019        |
| <b>Li<sup>+</sup></b>                             | Rh-Li           | 0.0236    | 0.1590                                  | 0.0208 | -0.0220 | -0.0012 | 1.059       | 0.8832          | 0.0783            | 1.8881                                          | 0.1244      | -0.0238     | -0.0222     | 0.071        |
|                                                   | Rh-P (average)  | 0.1076    | 0.7262                                  | 0.0846 | -0.1314 | -0.0468 | 1.553       | 0.7861          | 0.1514            | 3.6482                                          | 0.3212      | -0.0871     | -0.0826     | 0.054        |
| <b>Na<sup>+</sup></b>                             | Rh-Na           | 0.0201    | 0.1359                                  | 0.0172 | -0.0169 | 0.0003  | 0.981       | 0.8530          | 0.0700            | 1.6867                                          | 0.0994      | -0.0152     | -0.0143     | 0.066        |
|                                                   | Rh-P (average)  | 0.1047    | 0.7063                                  | 0.0830 | -0.1273 | -0.0443 | 1.534       | 0.7928          | 0.1546            | 3.7250                                          | 0.3173      | -0.0833     | -0.0794     | 0.048        |
| <b>MgBr<sub>2</sub></b>                           | Rh-Mg (average) | 0.0316    | 0.2136                                  | 0.0269 | -0.0301 | -0.0032 | 1.120       | 0.8489          | 0.0945            | 2.2780                                          | 0.1422      | -0.0241     | -0.0236     | 0.023        |
| <b>AlMe<sub>3</sub></b>                           | Rh-Al           | 0.0390    | 0.2631                                  | 0.0206 | -0.0347 | -0.0141 | 1.683       | 0.5292          | 0.0261            | 0.6295                                          | 0.0855      | -0.0304     | -0.0290     | 0.050        |
|                                                   | Rh-P (average)  | 0.1061    | 0.7157                                  | 0.0799 | -0.1257 | -0.0458 | 1.572       | 0.7537          | 0.1368            | 3.2956                                          | 0.3114      | -0.0898     | -0.0849     | 0.058        |
| <b>GeCl<sub>2</sub></b>                           | Rh-Ge           | 0.0721    | 0.4866                                  | 0.0324 | -0.0593 | -0.0269 | 1.830       | 0.4491          | 0.0220            | 0.5296                                          | 0.1406      | -0.0600     | -0.0586     | 0.024        |
|                                                   | Rh-P (average)  | 0.1024    | 0.6913                                  | 0.0731 | -0.1160 | -0.0429 | 1.588       | 0.7133          | 0.1205            | 2.9045                                          | 0.2911      | -0.0876     | -0.0830     | 0.055        |
| <b>SnCl<sub>2</sub></b>                           | Rh-Sn           | 0.0571    | 0.3853                                  | 0.0261 | -0.0430 | -0.0169 | 1.649       | 0.4563          | 0.0366            | 0.8810                                          | 0.1158      | -0.0399     | -0.0393     | 0.013        |
|                                                   | Rh-P (average)  | 0.1022    | 0.6899                                  | 0.0741 | -0.1168 | -0.0427 | 1.576       | 0.7252          | 0.1257            | 3.0301                                          | 0.2943      | -0.0865     | -0.0820     | 0.055        |
| <b>Zn(Me)<sub>2</sub></b>                         | Rh-Zn           | 0.0389    | 0.2626                                  | 0.0261 | -0.0339 | -0.0078 | 1.300       | 0.6705          | 0.0731            | 1.7612                                          | 0.1307      | -0.0289     | -0.0287     | 0.008        |
| <b>Zn(C<sub>6</sub>F<sub>5</sub>)<sub>2</sub></b> | Rh-Zn           | 0.0553    | 0.3732                                  | 0.0379 | -0.0545 | -0.0166 | 1.437       | 0.6860          | 0.0691            | 1.6644                                          | 0.1756      | -0.0460     | -0.0442     | 0.042        |
| <b>CuCl</b>                                       | Rh-Cu           | 0.0709    | 0.4785                                  | 0.0625 | -0.0874 | -0.0249 | 1.399       | 0.8817          | 0.1504            | 3.6244                                          | 0.2813      | -0.0665     | -0.0644     | 0.032        |

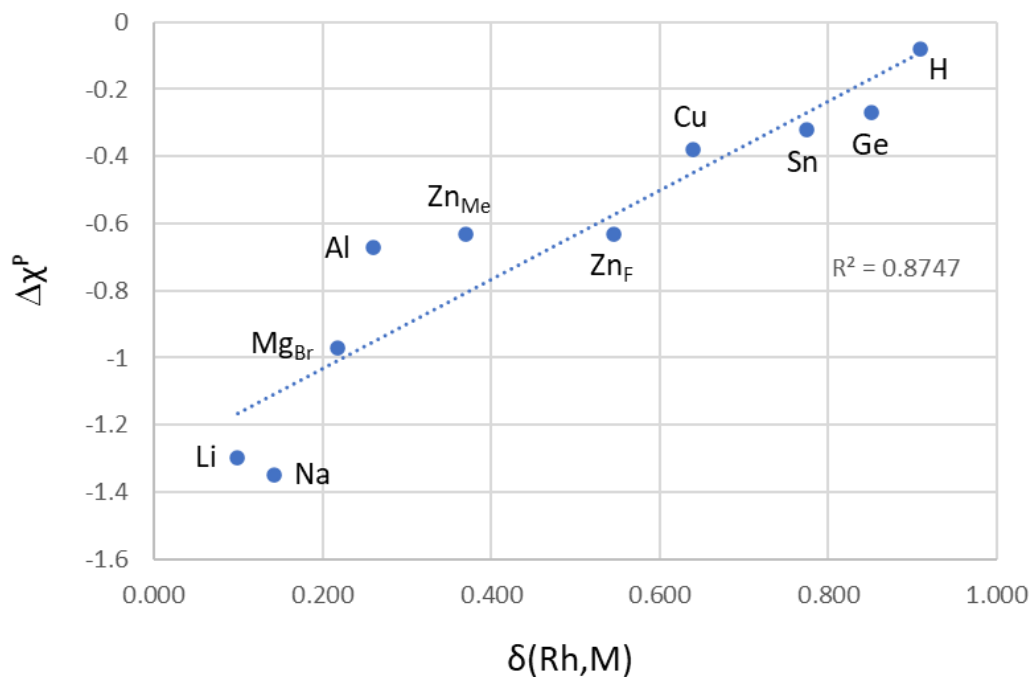

**Figure S4.** Correlation of the Pauling electronegativity difference ( $\Delta\chi^P = \chi^P(M \text{ or } H) - \chi^P(\text{Rh})$ ) with the delocalization indices between Rh and M (H) atoms of the species considered in this study.

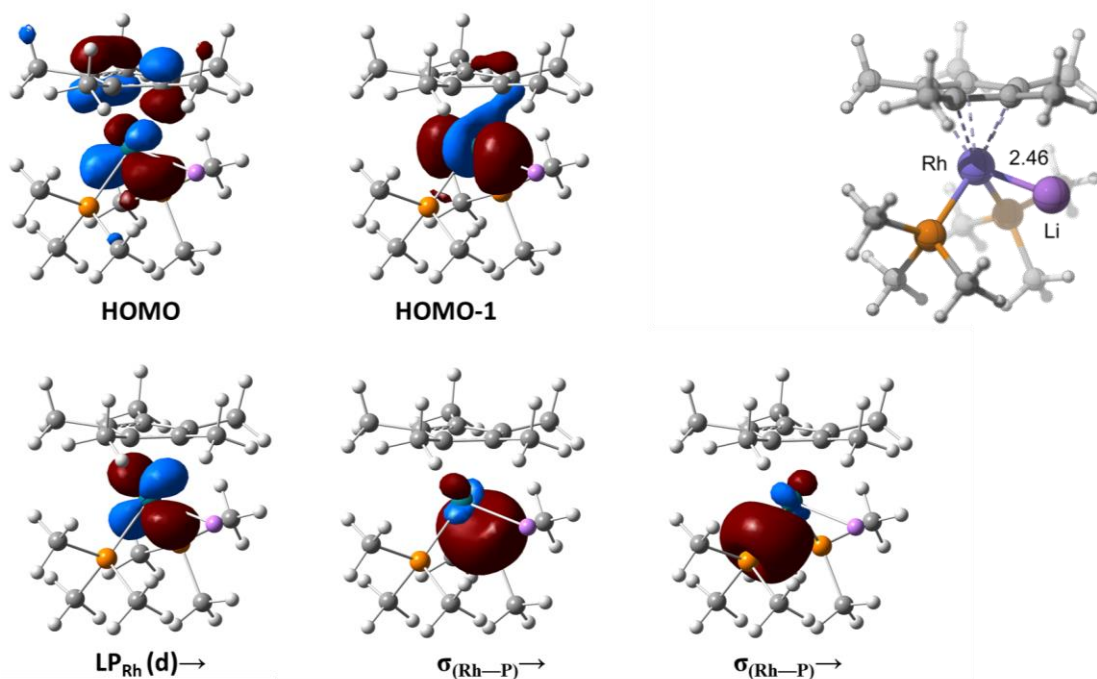

**Figure S5.** Relevant MOs and (isosurface value 0.05 a.u.) NBOs (isosurface value 0.06 a.u.) for **1·Li**.

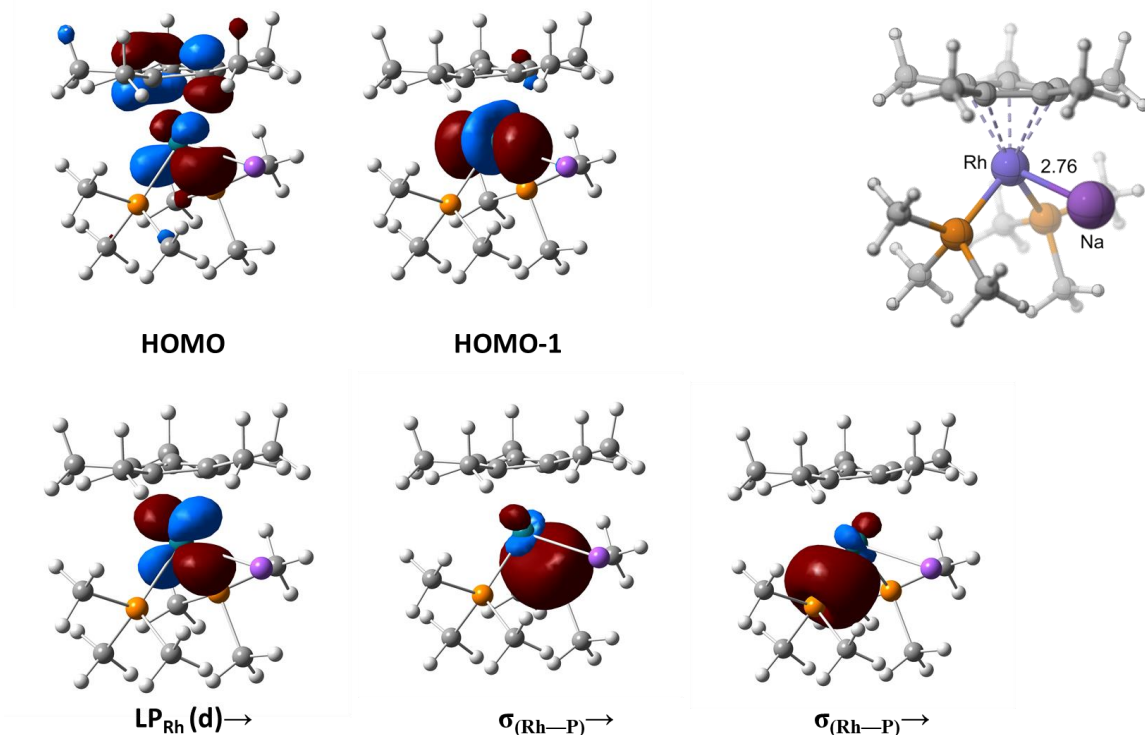

**Figure S6.** Relevant MOs and (isosurface value 0.05 a.u.) NBOs (isosurface value 0.06 a.u.) for **1·Na**.

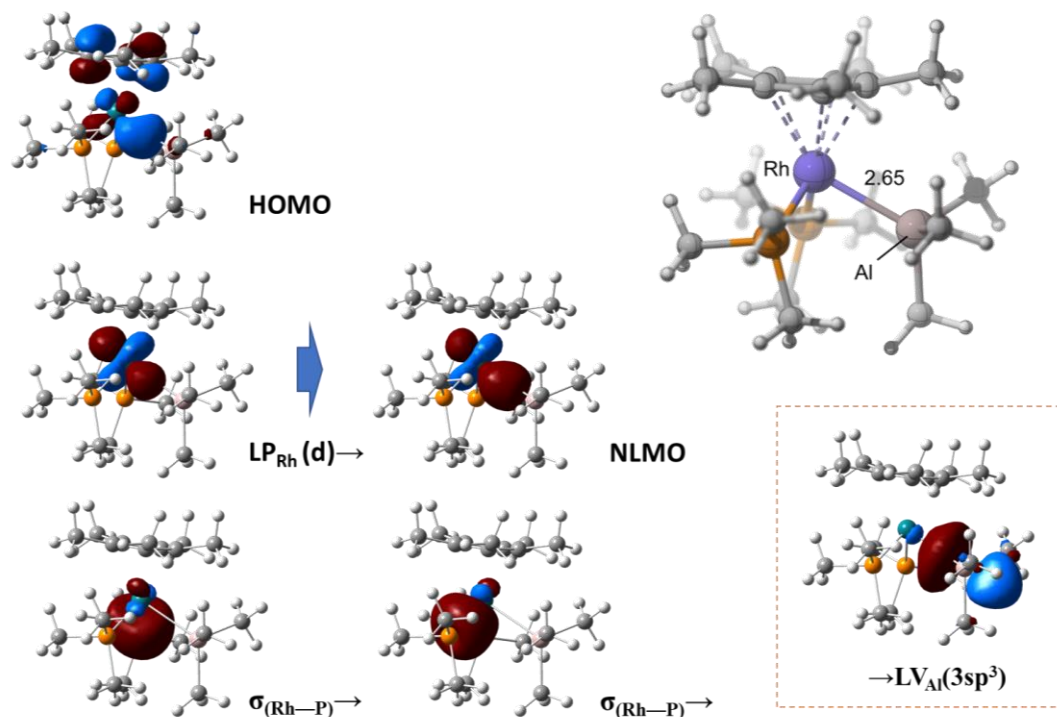

**Figure S7.** HOMO (isosurface value 0.05 a.u.) and relevant NBOs and associated NLMO (isosurface value 0.06 a.u.) for **1·AlMe<sub>3</sub>**.

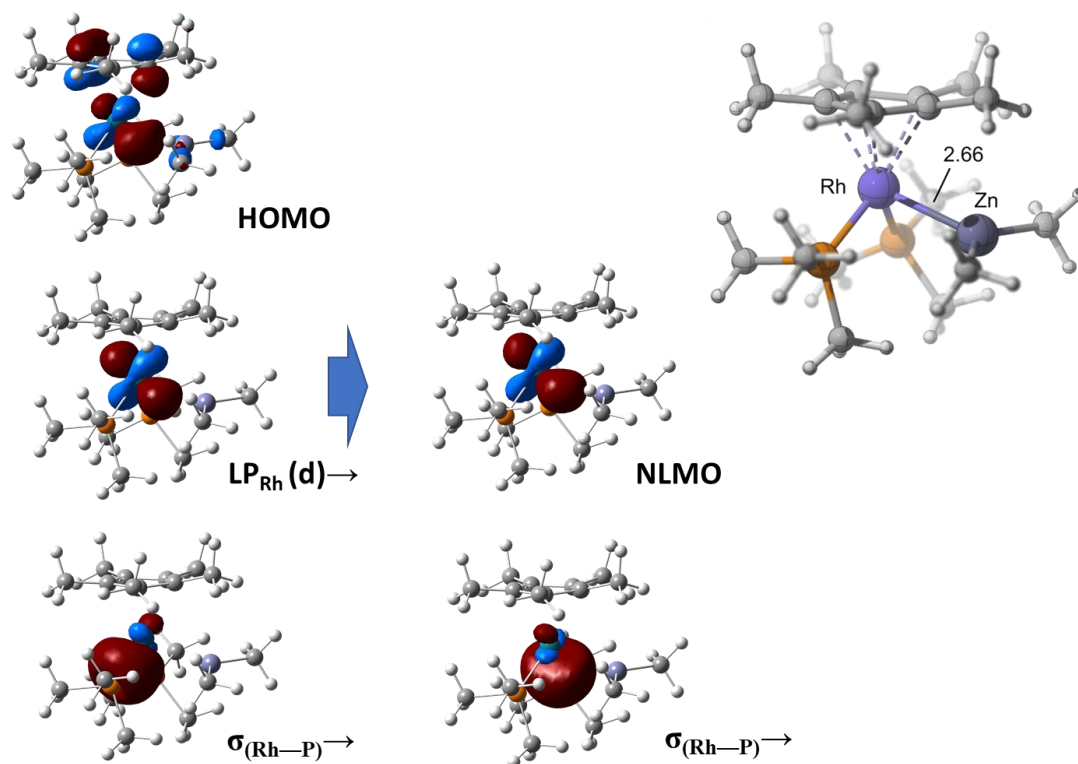

**Figure S8.** HOMO (isosurface value 0.05 a.u.) and relevant NBOs and associated NLMO (isosurface value 0.06 a.u.) for  $1 \cdot \text{ZnMe}_2$ .

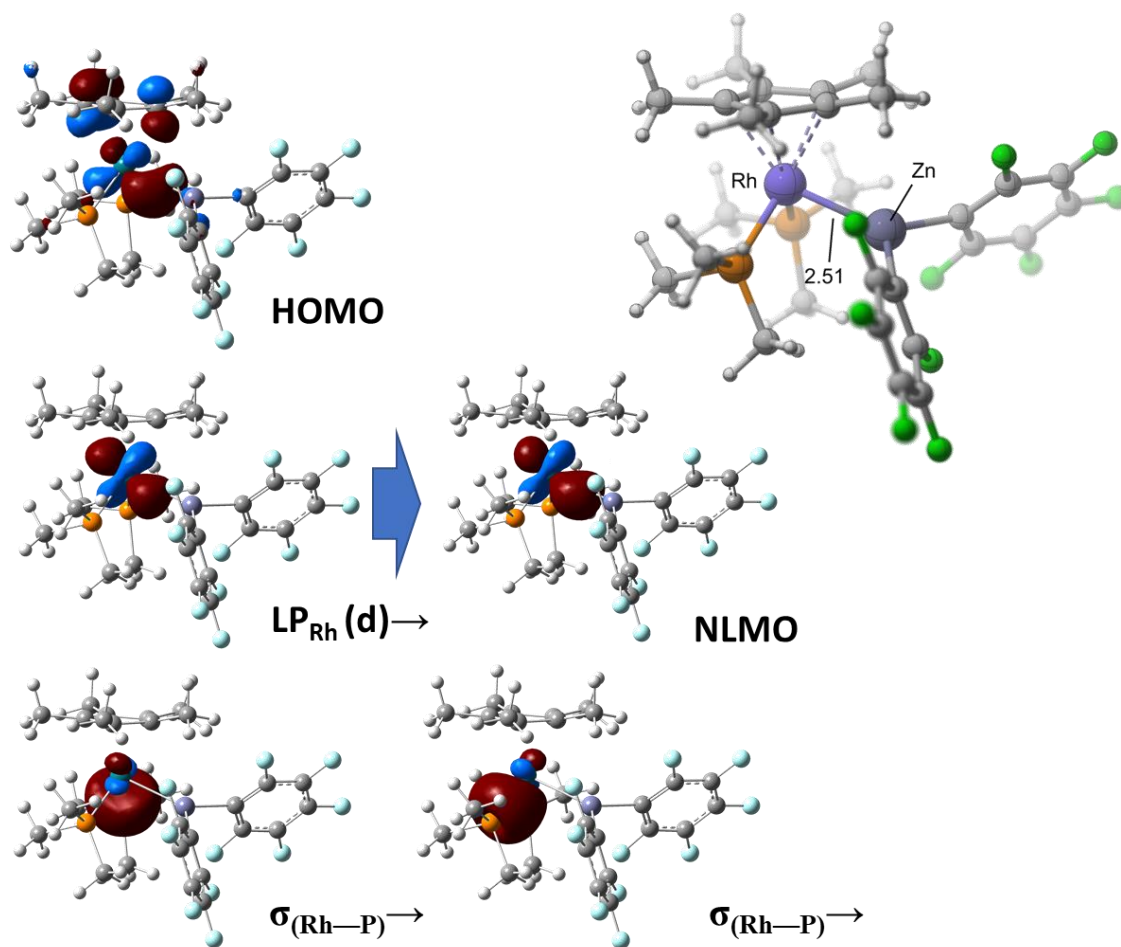

**Figure S9.** HOMO (isosurface value 0.05 a.u.) and relevant NBOs and associated NLMO (isosurface value 0.06 a.u.) for  $1 \cdot \text{Zn}(\text{C}_6\text{F}_5)_2$ .

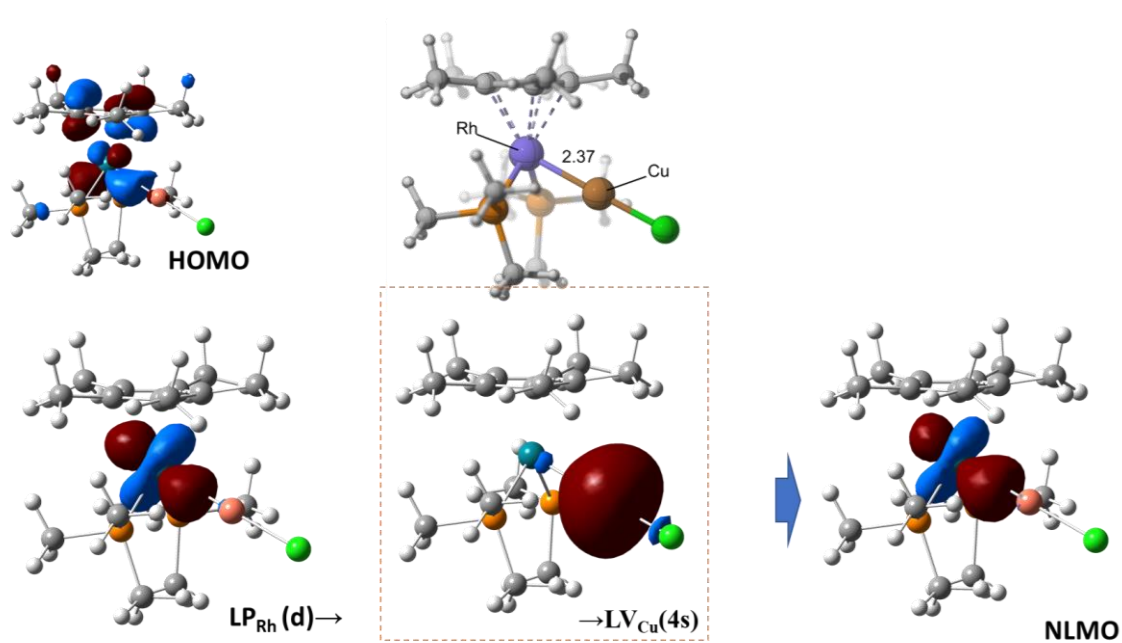

**Figure S10.** HOMO (isosurface value 0.05 a.u.) and relevant NBOs and associated NLMO (isosurface value 0.06 a.u.) for  $1 \cdot \text{CuCl}$ .

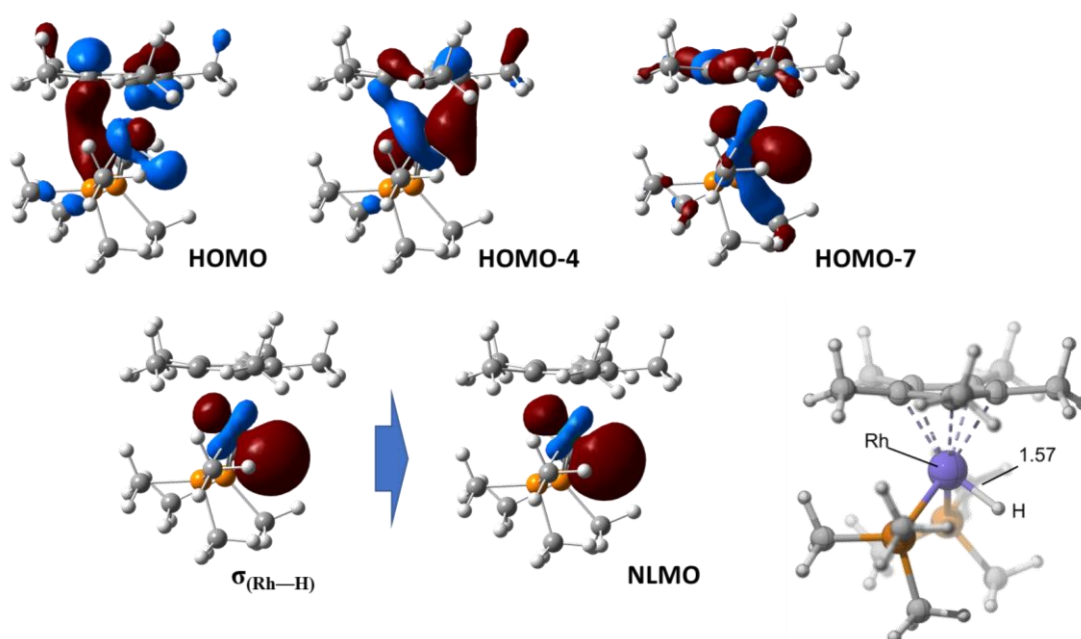

**Figure S11.** Relevant MOs (isosurface value 0.05 a.u.) and NBO and associated NLMO (isosurface value 0.06 a.u.) for the Rh hydride **2**.

## 5. References

- <sup>1</sup> H. Werner, B. Klingert, B. *Chem. Ber.* **1983**, *116*, 1450- 1462.
- <sup>2</sup> J. W. Kang, K. Mosley, P. M. Maitlis, *Chem. Commun.* **1968**, *21*, 1304–1305.
- <sup>3</sup> G. M. Sheldrick, *Acta Cryst.* **2008**, *A64*, 112–122.
